# Supplementary material for: Oxidative stress marker aberrations in children with autism spectrum disorder: a systematic review and meta-analysis of 87 studies (N = 9109)
Source: PubMed Central journal article supplement (PMC7791110; doi:10.1038/s41398-020-01135-3), 2021-01-05
Supplement: 41398_2020_1135_MOESM1_ESM.pdf [file 41398_2020_1135_MOESM1_ESM.pdf]

## Supplementary Online Content

**eTable 1:** Characteristics of included studies measuring blood oxidative stress markers.

**eTable 2:** Newcastle-Ottawa quality assessment scale for included studies.

**eTable 3:** Sub-group analysis stratified by source of healthy volunteer for homocysteine, methionine, vitamin B9, vitamin B12, vitamin D and GSH.

**eFigure 1:** PRISMA flowchart of the literature search.

**eFigure 2:** Sub-group analysis stratified by source of sampling, age matched and gender matched for homocysteine, methionine, cysteine, vitamin B9, vitamin B12, vitamin D and GSH.

**eFigure 3:** Meta-regressions of age, gender, publication year and latitude for homocysteine, methionine, cysteine, vitamin B9, vitamin B12, vitamin D and GSH.

**eFigure 4:** Funnel plots for homocysteine, methionine, cysteine, vitamin B9, vitamin B12, vitamin D and GSH.

**eReference:** Included 87 studies for meta-analysis.

**eTable 1: Characteristics of included studies measuring blood oxidative stress markers**

| Study/Year            | Markers Measured                                                  | Country      | Samples (ASD/HC) | Gender (%Male) (ASD/HC) | Mean Age (ASD/HC) | Age/Gender matched | Diagnosis       | Sample Source | Assay type                  | Sources of healthy volunteers | BMI (ASD/HC) |
|-----------------------|-------------------------------------------------------------------|--------------|------------------|-------------------------|-------------------|--------------------|-----------------|---------------|-----------------------------|-------------------------------|--------------|
| Adams JB et al.2006   | VB6                                                               | USA          | 11/11            | 73/90.9                 | 7.2/7.8           | Y/N                | NA              | plasma        | NA                          | Local community               | NA           |
| Adams JB et al.2011   | VA, VB6, VB9, VB12, VC, VD, VE, Na, Mg, Ca, Fe, Se, Met, Ferritin | USA          | 55/44            | 89/89                   | 10/11             | Y/Y                | NA              | plasma, serum | LC-MS, MS, HPLC             | Local community               | NA           |
| Adams M et al.2007    | VB9, VB12, Hcy                                                    | USA          | 17/16            | NA                      | NA                | Y/N                | DSM-IV, ADOS    | serum         | CLIA, HPLC                  | NA                            | NA           |
| Afrazeh et al. 2015   | SOD                                                               | Iran         | 27/18            | 77.8/55.6               | NA                | Y/Y                | CARS, DSM-IV    | serum         | ELISA                       | NA                            | 18.23/20.96  |
| Al-Farsi et al.2013   | VB9, VB12, Hcy, Met                                               | Oman         | 40/40            | 50/50                   | 4.8/4.8           | Y/Y                | CARS, DSM-IV-TR | serum         | HPLC                        | Hospital                      | NA           |
| Al-Gadani et al. 2009 | VE, VC, GPx, CAT, SOD, GSH                                        | Saudi Arabia | 30/30            | 73.33/66.67             | NA                | Y/N                | DSM-IV          | plasma        | Commercially available kits | NA                            | NA           |
| Ali et al.2011        | Hcy, VB9, VB12                                                    | Oman         | 40/40            | NA                      | NA                | Y/Y                | DSM-IV-TR, CARS | serum         | EIA                         | Hospital                      | NA           |
| Altun et al. 2018     | VD, Hcy, VB6, VB9, VB12, Ca                                       | Turkey       | 60/45            | 86.7/80                 | 5.8/6.7           | Y/Y                | CARS, DSM-IV-TR | serum         | ELISA                       | NA                            | 18.6/19.6    |

| Study/Year           | Markers Measured          | Country      | Samples (ASD/HC) | Gender (%Male) (ASD/HC) | Mean Age (ASD/HC) | Age/Gender matched | Diagnosis           | Sample Source | Assay type                  | Sources of healthy volunteers | BMI (ASD/HC) |
|----------------------|---------------------------|--------------|------------------|-------------------------|-------------------|--------------------|---------------------|---------------|-----------------------------|-------------------------------|--------------|
| Al-Yafee et al. 2011 | GSSG, tGSH, GST, GSH/GSSG | Saudi Arabia | 20/20            | 100/100                 | NA                | Y/Y                | ADI-R, ADOS, 3DI    | plasma        | Commercially available kits | Hospital                      | NA           |
| Arastoo et al.2018   | VD                        | Iran         | 31/31            | 83.9/90.3               | 9.17/9.31         | Y/Y                | DSM-IV, ADI-R       | serum         | ELISA                       | Schools                       | NA           |
| Bala KA et al.2016   | VB9, VB12, VD, Ferritin   | Turkey       | 16/27            | 62.5/48.1               | 7.88/9.80         | Y/Y                | DSM-IV, DSM-V, CARS | serum         | CLIA                        | Hospital                      | NA           |
| Bener et al.2014     | VD, Ca, Mg, Ferritin      | UK           | 254/254          | 64.9/56.7               | NA                | Y/N                | ADOS, ADI-R         | serum         | Commercially available kits | Primary Health Care Centers   | NA           |
| Bičíková et al. 2019 | VD                        | Czech        | 45/40            | 100/100                 | NA                | Y/Y                | NA                  | serum         | ECLIA method                | NA                            | NA           |
| Bugajska et al.2017  | Met                       | Poland       | 27/13            | 100/100                 | 4.37/5.00         | Y/Y                | NA                  | plasma        | HPLC-UV/VIS                 | NA                            | NA           |
| Cai et al.2016       | Hcy                       | China        | 51/51            | 82.4/82.4               | 3.69/3.69         | Y/Y                | DSM-IV, CARS        | plasma        | LC-MS                       | Kindergarten                  | NA           |
| Chauhan et al.2004   | Cp, Tf, MDA               | USA          | 19/19            | NA                      | 4.4/6.0           | Y/Y                | ADI-R, ADOS-G       | serum, plasma | Commercially available kits | Unaffected Siblings           | NA           |
| Chen et al. 2016     | Hcy, VB12, VD             | China        | 68/68            | 78/78                   | 3.85/3.85         | Y/Y                | DSM-V, CARS         | serum         | Commercially available kits | Kindergarten                  | 26.4/26.2    |

| Study/Year              | Markers Measured           | Country      | Samples (ASD/HC) | Gender (%Male) (ASD/HC) | Mean Age (ASD/HC) | Age/Gender matched | Diagnosis             | Sample Source | Assay type                  | Sources of healthy volunteers    | BMI (ASD/HC) |
|-------------------------|----------------------------|--------------|------------------|-------------------------|-------------------|--------------------|-----------------------|---------------|-----------------------------|----------------------------------|--------------|
| Cheng et al. 2020       | VA                         | China        | 323/180          | 84.8/78.9               | 4.72/4.74         | Y/Y                | DSM-V, CARS, SRS, ABC | serum         | spectrophotometry           | Kindergartens and primary school | 15.96/16.25  |
| Cortelazzo et al.2016   | TG, TC                     | Italy        | 30/30            | 80/66.67                | 12.0/11.7         | Y/Y                | DSM-V, ADOS, ABC      | plasma        | NA                          | NA                               | NA           |
| Coşkun et al.2016       | VD                         | Turkey       | 85/82            | 84.7/65.8               | 3.617/3.925       | Y/N                | DSM-V                 | serum         | ELISA                       | Local community                  | NA           |
| D'Eufemia et al.1995    | Met                        | Italy        | 40/46            | 67.5/58.6               | 12.33/11.17       | Y/N                | DSMIII-R              | serum         | HPLC                        | NA                               | NA           |
| El-Ansary et al. 2010   | Ca, K, Na, Mg, MDA         | Saudi Arabia | 30/30            | 73.33/66.67             | NA                | Y/N                | DSM-IV                | plasma        | Commercially available kits | NA                               | NA           |
| El-Ansary AK et al.2011 | Ca, Mg,                    | Saudi Arabia | 25/16            | 100/100                 | NA                | Y/Y                | ADI-R, ADOS, 3DI      | plasma        | Commercially available kits | Hospital                         | NA           |
| El-Ansary et al. 2016   | GST                        | Saudi Arabia | 20/20            | 100/100                 | 7/7               | Y/Y                | ADI-R, ADOS, 3DI      | plasma        | HPLC, ELISA                 | Hospital                         | NA           |
| El-Ansary et al. 2017   | VE, VC, GSH, CAT, GPx, SOD | Saudi Arabia | 30/30            | 73.33/66.67             | NA                | Y/N                | ADI-R, ADOS, 3DI      | plasma        | ELISA                       | Hospital                         | NA           |
| El-Ansary et al.2018    | VD                         | Saudi Arabia | 28/27            | 100/100                 | 7.0/7.2           | Y/Y                | DSM-IV-TR, CARS, SRS  | plasma        | HPLC, ELISA                 | Unaffected siblings              | NA           |

| Study/Year            | Markers Measured        | Country | Samples (ASD/HC) | Gender (%Male) (ASD/HC) | Mean Age (ASD/HC) | Age/Gender matched | Diagnosis              | Sample Source | Assay type                  | Sources of healthy volunteers | BMI (ASD/HC) |
|-----------------------|-------------------------|---------|------------------|-------------------------|-------------------|--------------------|------------------------|---------------|-----------------------------|-------------------------------|--------------|
| Essa et al. 2012      | MDA, NO                 | Oman    | 19/19            | 78.95/52.63             | NA                | Y/N                | DSM-IV, CARS           | plasma        | Commercially available kits | Local community               | NA           |
| Eto et al.1992        | VB9                     | USA     | 16/11            | 63/33                   | 12.31/10.44       | N/N                | DSM-III R              | plasma        | HPLC                        | Local community               | NA           |
| Fatemi et al.2002     | Cp                      | USA     | 28/8             | 78.5/50                 | 7.4/38.3          | N/N                | DSM-IV, ADI            | serum         | NA                          | Local community               | NA           |
| Feng J et al.2016     | VD                      | China   | 215/285          | 80.47/78.95             | 4.76/ 5.12        | Y/Y                | ABC, CARS              | serum         | HPLC                        | Children activity centers     | NA           |
| Garipardic et al.2017 | Ferritin, VB9, VB12, VD | Turkey  | 18/25            | 61.1/48                 | 8.11/9.90         | Y/N                | DSM-V, DSM-IV-TR, CARS | serum         | CLIA                        | Local community               | NA           |
| Geier et al.2009      | Cys, GSH, GSSG          | USA     | 38/120           | 89/                     | 6.0/              | Y/N                | CARS                   | plasma        | HPLC, LC                    | Local community               | NA           |
| Ghodsi et al. 2019    | MDA                     | Iran    | 36/18            | 75/ 77.8                | 8.64/7.5          | Y/Y                | DSM-V                  | plasma        | ELISA                       | NA                            | NA           |
| Gong et al.2013       | VD, Ca, Mg              | China   | 48/48            | 83.33/83.33             | 3.67/3.67         | Y/Y                | DSM-IV, CARS           | serum         | NA                          | Kindergarten                  | 15.8/ 16.3   |
| Grayaa et al. 2018    | TC, TG                  | Italy   | 36/38            | 63.89/65.79             | 4.62/4.61         | Y/N                | DSM-V, CARS            | plasma        | Commercially available kits | NA                            | 17.21/19.10  |

**Abbreviations:** ASD, Autistic Spectrum Disorder; HC, Healthy Control; Y/N, yes/no; BMI, Body Mass Index; VA ,Vitamin A; VB6, Vitamin B6; VB9, Vitamin B9;

| Study/Year          | Markers Measured                                                       | Country | Samples (ASD/HC) | Gender (%Male) (ASD/HC) | Mean Age (ASD/HC) | Age/Gender matched | Diagnosis                  | Sample Source | Assay type                         | Sources of healthy volunteers | BMI (ASD/HC) |
|---------------------|------------------------------------------------------------------------|---------|------------------|-------------------------|-------------------|--------------------|----------------------------|---------------|------------------------------------|-------------------------------|--------------|
| Gunes et al.2017    | Ferritin, Fe                                                           | Turkey  | 100/100          | NA                      | 8.36/ 11.01       | Y/Y                | DSM-V, CARS                | serum         | NA                                 | Hospital                      | NA           |
| Guo et al. 2018     | VA, VB9, VB12, VD, Ferritin, Ca, Mg, Fe, Zn, Cu                        | China   | 274/97           | 86.13/ 51.54            | 4.06/ 4.24        | Y/N                | DSM-V, ABC, SRS, GDS       | serum         | HPLC                               | Local community               | NA           |
| Guo et al. 2019     | VA, VD                                                                 | China   | 332/197          | 86.14/81.72             | 4.87/4.75         | Y/N                | DSM-V, ABC, CARS, GDS, GDS | serum         | HPLC                               | NA                            | NA           |
| Han et al.2015      | Hcy, Cys, tGSH, GSH, GSSG                                              | China   | 50/50            | 78/78                   | 7.64/8.38         | Y/N                | CARS, ABC                  | serum         | Commercially available kits, HPLC  | Schools                       | NA           |
| Hassan et al.2019   | TC                                                                     | Egypt   | 73/73            | 100/100                 | NA                | Y/Y                | CARS                       | serum         | ELISA, Commercially available kits | Hospital                      | NA           |
| Hodgson et al. 2014 | GSH, Cys, Hcy, SAH, SAM/SAH                                            | USA     | 27/27            | 81.5/74.1               | 5.3/5.5           | Y/Y                | DSM-IV-TR, CARS            | serum         | HPLC                               | Hospital                      | NA           |
| James et al. 2004   | SAM, SAH, SAM/SAH, Hcy, CTH, Cys, GSSG, tGSH, tGSH/GSSG                | USA     | 20/33            | 70/75.76                | 6.4/7.4           | Y/Y                | DSM-IV                     | plasma        | HPLC                               | NA                            | NA           |
| James et al.2006    | Met, SAM, SAH, SAM/SAH, Hcy, Cys, tGSH, GSSG, CTH, GSH/GSSG, tGSH/GSSG | USA     | 80/73            | 89/                     | 7.3/10.8          | N/N                | DSM-IV, ADOS, CARS         | plasma        | HPLC                               | NA                            | NA           |
| James et al. 2009   | Met, SAM, SAH, SAM/SAH, Hcy, Cys,tGSH, GSH, GSSG, GSH/GSSG, tGSH/GSSG  | USA     | 40/42            | 82/                     | 4.8/4.5           | N/N                | DSM-IV, CARS               | plasma        | HPLC                               | NA                            | NA           |

VB12, Vitamin B12; VC, Vitamin C; VD, Vitamin D; VE, Vitamin E; GSH, reduced glutathione; GSSG, oxidized glutathione; tGSH, total glutathione; GPx,

| Study/Year          | Markers Measured                                                 | Country      | Sample (ASD/HC) | Gender (%Male) (ASD/HC) | Mean Age (ASD/HC) | Age/Gender matched | Diagnosis              | Sample Source | Assay type                        | Sources of healthy volunteers | BMI (ASD/HC) |
|---------------------|------------------------------------------------------------------|--------------|-----------------|-------------------------|-------------------|--------------------|------------------------|---------------|-----------------------------------|-------------------------------|--------------|
| Kim et al.2010      | TC, TG                                                           | South Korea  | 29/29           | 100/100                 | 10.1/10.9         | Y/Y                | DSM-III-R, DSM-IV      | plasma        | NA                                | School                        | 20.2/18.6    |
| Kondolot et al.2016 | MDA, GPx, SOD, GSH, CAT                                          | Turkey       | 51/50           | 78/80                   | 5.8/5.6           | Y/Y                | DSM-V, DSM IV-TR, CARS | plasma        | Commercially available kits, HPLC | Hospital                      | NA           |
| Li SO et al.2014    | Zn, Cu                                                           | China        | 60/60           | 80/80                   | 3.78/3.78         | Y/Y                | DSM-IV, CARS           | serum         | NA                                | Kindergarten                  | NA           |
| Main et al. 2014    | VB12, Hcy                                                        | Australia    | 35/25           | 94.3/ 92                | 7.57/8.56         | Y/N                | DSM-IVTR               | serum         | Commercially available kits       | Local community               | NA           |
| Meguid et al.2010   | VD, Ca                                                           | Egypt        | 70/42           | NA                      | 5.3/6.1           | Y/N                | DSM IV, ADI-R          | serum         | RIA                               | Hospital                      | NA           |
| Meguid et al.2011   | SOD, GPx, MDA                                                    | Egypt        | 20/25           | 90/92                   | 4.7/6.0           | N/N                | DSM-IV-TR, CARS        | plasma        | Commercially available kits       | NA                            | NA           |
| Melnyk et al.2012   | Met, SAM, SAH, SAM/SAH, Hcy, Cys, GSH, GSSG, GSH/GSSG, VB9, VB12 | USA          | 40/54           | NA                      | 5.8/6.3           | Y/N                | DSM-IV, ADOS, CARS     | plasma        | HPLC-UV                           | Local community               | NA           |
| Mostafa et al. 2010 | GPx                                                              | Egypt        | 44/44           | 30/44                   | NA                | Y/Y                | DSM-IV                 | plasma        | Commercially available kits       | Hospital                      | NA           |
| Mostafa et al.2012  | VD                                                               | Saudi Arabia | 50/30           | 78/80                   | 8.24/8.63         | Y/Y                | DSM, CARS              | serum         | ELISA                             | Unaffected siblings           | NA           |

Glutathione peroxidase; GST, Glutathione-S-transferases; SOD, Superoxide dismutase; MDA, Malondialdehyde; CAT, Catalase; 8-OHdG, 8-hydroxy--2deoxyguanosine; Cys, cysteine; CTH, cystathionine; Hcy, homocysteine; Met, methionine; SAM, S-adenosyl methionine; SAH, S-adenosyl homocysteine; TC,

| Study/Year           | Markers Measured                                               | Country | Samples (ASD/HC) | Gender (%Male) (ASD/HC) | Mean Age (ASD/HC) | Age/Gender matched | Diagnosis            | Sample Source | Assay type                         | Sources of healthy volunteers                       | BMI (ASD/HC) |
|----------------------|----------------------------------------------------------------|---------|------------------|-------------------------|-------------------|--------------------|----------------------|---------------|------------------------------------|-----------------------------------------------------|--------------|
| Ning et al. 2018     | Hcy                                                            | China   | 102/102          | 78.43/78.43             | 4.5/4.5           | Y/Y                | DSM-V, CARS          | serum         | ELISA                              | Kindergarten                                        | 16.6/17.4    |
| Oshodi et al. 2017   | GSH, SOD, GST, MDA                                             | Nigeria | 42/23            | 71.4/60.9               | 8.4/              | Y/N                | DSM-V                | plasma        | NA                                 | Hospital                                            | NA           |
| Parellada et al.2012 | SOD, GSH, CAT, Hcy, VB12, VA, VE, GPx, MDA, Tf, Cp, Cu, Zn, Fe | Spain   | 35/34            | 94.2/91.1               | 12.89 /12.79      | Y/Y                | DSM-IV, ADOS         | plasma        | Commercially available kits        | Schools                                             | NA           |
| Pasca et al.2006     | Hcy, GPx                                                       | Romania | 12/9             | 75/67                   | 8.29/8.33         | Y/N                | DSM-IV               | plasma        | HPLC                               | NA                                                  | NA           |
| Paşca et al.2009     | Met, Hcy, Cys, CTH, VB9, VB12                                  | Romania | 39/43            | 79.4/67.4               | 7.44/8.31         | N/N                | DSM-IVR              | plasma, serum | GS-MS, Commercially available kits | NA                                                  | NA           |
| Ramaekers et al.2013 | VB9                                                            | Belgium | 75/30            | 81.3/63.3               | 6.8/7.6           | Y/N                | NA                   | Plasma        | NA                                 | NA                                                  | NA           |
| Rose et al. 2012     | GSH, GSSG, GSH/GSSG                                            | USA     | 38/41            | 84/49                   | 5.42/6.16         | N/N                | DSM-IV               | plasma        | HPLC                               | Unaffected siblings                                 | NA           |
| Russo et al. 2011    | Cu, Zn                                                         | USA     | 152/18           | 88.15/NA                | 11.52/NA          | Y/Y                | DSM-IV, ADI-R        | plasma        | MS                                 | Health Research Institute/Pfeiffer Treatment Center | NA           |
| Saad et al. 2016     | VD                                                             | Egypt   | 122/100          | 75/75                   | 5.09/4.88         | Y/Y                | DSM-IV-TR, CARS, ABC | serum         | ELISA                              | Hospitals and unaffected siblings                   | NA           |

Total Cholesterol; TG, Triglycerides; Tf, transferrin; Cp, ceruloplasmin; NO, Nitric Oxide; Cu, copper; Zn, zinc; Ca, calcium; Fe, iron; Se, selenium; Mg,



| Study/Year           | Markers Measured                      | Country | Samples (ASD/HC) | Gender (%Male) (ASD/HC) | Mean Age (ASD/HC) | Age/Gender matched | Diagnosis         | Sample Source | Assay type                        | Sources of healthy volunteers | BMI (ASD/HC) |
|----------------------|---------------------------------------|---------|------------------|-------------------------|-------------------|--------------------|-------------------|---------------|-----------------------------------|-------------------------------|--------------|
| Saad et al.2017      | VD                                    | Egypt   | 32/30            | 68.75/66.7              | 2.9/3.1           | Y/Y                | DSM-V, CARS       | serum         | ELISA                             | NA                            | NA           |
| Saha et al.2019      | VB9, VB6                              | India   | 79/30            | 82.5/                   | 6.016             | Y/Y                | DSM IV            | plasma        | ELISA                             | NA                            | NA           |
| Shimmura et al.2011  | Met, Cys                              | Japan   | 23/22            | 100/100                 | 13.5/12.2         | Y/Y                | ADI-R             | plasma        | HPLC                              | NA                            | 18.6/17.8    |
| Skalny et al.2017(a) | Cu, Zn, Ca, Mg, Se, Fe                | Russia  | 48/48            | NA                      | 6.6/6.5           | Y/Y                | ICD-10, CARS      | serum         | Commercially available kits       | NA                            | NA           |
| Skalny et al.2017(b) | Cu, Fe, Se, Zn                        | Russia  | 70/70            | 57.1/57.1               | 6.4/6.3           | Y/Y                | ICD-10            | serum         | Spectrometry                      | NA                            | NA           |
| Söğüt et al.2003     | SOD, GPx, MDA                         | Turkey  | 27/30            | 59.2/53.3               | 4.7/5.1           | Y/Y                | DSM-IV, CARS      | plasma        | NA                                | Kindergarten and school       | NA           |
| Suh et al.2008       | Met, Cys, CTH, SAH, SAM, Hcy, GSH     | USA     | 31/11            | 87/82                   | 4.2/6.9           | N/N                | DSM IV, ADI-R     | plasma        | HPLC, Commercially available kits | Pfeiffer treatment center     | NA           |
| Sun et al. 2016      | VB9, VB12, Hcy, tGSH, GSSG, tGSH/GSSG | China   | 29/29            | NA                      | NA                | Y/Y                | DSM-IV, CARS, ABC | plasma        | HPLC                              | Community Health Care Center  | NA           |
| Sweeten et al.2004   | NO                                    | USA     | 29/27            | 86/85                   | 6.1/6.5           | Y/Y                | DSM-IV, ADI-R     | plasma        | Commercially available kits       | Local community               | NA           |

| Study/Year              | Markers Measured | Country | Samples (ASD/HC) | Gender (%Male) (ASD/HC) | Mean Age (ASD/HC) | Age/Gender matched | Diagnosis    | Sample Source | Assay type                    | Sources of healthy volunteers | BMI (ASD/HC) |
|-------------------------|------------------|---------|------------------|-------------------------|-------------------|--------------------|--------------|---------------|-------------------------------|-------------------------------|--------------|
| Sweetman et al.2019     | Zn, VA           | Ireland | 74/72            | 88/56                   | 9.99/6.43         | N/N                | DSM-IV, ADOS | serum         | MS                            | NA                            | NA           |
| Tirouvanziam et al.2011 | Met              | USA     | 27/20            | 77.8/45                 | 7/7.33            | Y/N                | ADI-R, ADOS  | plasma        | LC-MS                         | Local community               | NA           |
| Tostes et al.2012       | NO               | Brazil  | 24/24            | 75/75                   | 7.4/7.2           | Y/Y                | DSM-IV       | plasma        | ELISA                         | School                        | NA           |
| Tu et al.2013           | Hcy, VB9, VB12   | China   | 30/30            | 83.33/83.33             | 3.55 /3.55        | Y/Y                | DSM-IV       | serum         | Chemiluminescence immunoassay | NA                            | NA           |
| Vergani et al.2011      | Ca, Zn, Cu, Fe   | Italy   | 28/32            | 75/63                   | NA                | N/N                | DSM-IV       | plasma        | ICP-AES                       | NA                            | NA           |
| Wang et al.2016         | SOD, Hcy         | China   | 98/98            | 79.6/79.6               | 3.85/3.85         | Y/Y                | DSM-V, CARS  | serum         | NA                            | Kindergarten                  | 16.22 /16.93 |
| Yektas et al.2019       | VB12, VB9, Hcy   | Turkey  | 35/35            | 80/100                  | NA                | N/N                | DSM-IV, CARS | serum         | Spectrometry                  | NA                            | NA           |
| Yenkoyan et al. 2018    | SOD, CAT, MDA    | Armenia | 10/10            | 40/40                   | NA                | Y/Y                | ADI-R, ADOS  | plasma        | Spectrometry                  | Unaffected siblings           | NA           |
| Yorbik et al.2002       | SOD, GPx         | Turkey  | 45/41            | 87/85                   | 6.4/6.7           | Y/Y                | DSM IV       | Plasma        | Spectrometry                  | School                        | NA           |

| Study/Year         | Markers Measured | Country | Samples (ASD/HC) | Gender (%Male) (ASD/HC) | Mean Age (ASD/HC) | Age/Gender matched | Diagnosis          | Sample Source | Assay type                  | Sources of healthy volunteers | BMI (ASD/HC) |
|--------------------|------------------|---------|------------------|-------------------------|-------------------|--------------------|--------------------|---------------|-----------------------------|-------------------------------|--------------|
| Yui et al. 2016(a) | SOD              | Japan   | 20/12            | 65/66.67                | 11.1/14.3         | Y/Y                | DSM-V, ADI-R       | plasma        | Commercially available kits | Local community               | NA           |
| Yui et al.2016(b)  | Cp, Tf, SOD      | Japan   | 28/21            | 71.4/71.4               | 13.5/13.9         | Y/Y                | DSM-IV-TR, ADI-R   | plasma        | Commercially available kits | Local community               | NA           |
| Yui et al.2016(c)  | SOD, Cp, Tf      | Japan   | 30/20            | 66.67/70                | 13.6/13.2         | Y/Y                | DSM-IV-TR, ADI-R   | plasma        | Commercially available kits | Local community               | NA           |
| Yui et al. 2017    | SOD              | Japan   | 20/11            | 65/63.63                | 10.7/14.7         | Y/Y                | DSM-V, ADI-R, ADOS | plasma        | Commercially available kits | NA                            | NA           |
| Zaki et al.2017    | Met, Cys,        | Egypt   | 42/26            | 81/81                   | NA                | Y/Y                | DSM-IV, ADI-R      | plasma        | HPLC                        | NA                            | NA           |
| Zhang et al.2015   | Hcy              | China   | 80/100           | 78.75/79                | 3.82/3.79         | Y/Y                | CARS               | serum         | Commercially available kits | Kindergarten                  | 15.52/16.83  |
| Zhou W et al.2018  | VA, Hcy          | China   | 81/81            | 79/79                   | 3.8/3.8           | Y/Y                | DSM-V, CARS        | serum         | ELISA                       | NA                            | 16.8/17.7    |

magnesium; DSM-IV-TR, Diagnostic and Statistical Manual of Mental Disorders-4th Edition Text Revision; ADI-R, Autism Diagnostic Interview–Revised; ADOS, Autism Diagnostic Observation Schedule; 3DI, Developmental, dimensional diagnostic interview; ABC, Autism Behavior Checklist; CARS, Childhood Autism Rating Scale; HPLC, High Performance Liquid Chromatography; ELISA, enzyme linked immunosorbent assay; LC-MS, liquid chromatography-tandem mass spectroscopy; CLIA, Chemiluminescence method; EIA, enzyme immunoassay; HPLC-UV/Vis, High Performance Liquid Chromatography-Visible Spectrophotometer; RIA, Radioimmunoassay; GS-MS, gas chromatography/mass spectrometry; ICP-AES, Inductively Coupled Plasma Atomic Emission

Spectrometer.

**eTable 2.** Newcastle-Ottawa quality assessment scale for included studies.

| <b>Between-Group Studies</b> | <b>Selection</b> | <b>Comparability</b> | <b>Exposure</b> | <b>Total</b> |
|------------------------------|------------------|----------------------|-----------------|--------------|
| Adams JB et al.2006          | ***              | *                    | *               | 5            |
| Adams JB et al.2011          | ***              | **                   | **              | 7            |
| Adams M et al.2007           | **               | *                    | *               | 4            |
| Afrazeh et al. 2015          | ****             | **                   | **              | 8            |
| Al-Farsi et al.2013          | ****             | **                   | **              | 8            |
| Al-Gadani et al. 2009        | *                | **                   | **              | 5            |
| Ali et al.2011               | ***              | **                   | **              | 7            |
| Altun et al. 2018            | **               | **                   | **              | 6            |
| Al-Yafee et al. 2011         | ***              | **                   | **              | 7            |
| Arastoo et al.2018           | ***              | **                   | **              | 7            |
| Bala KA et al.2016           | ***              | **                   | *               | 6            |
| Bener et al.2014             | **               | **                   | *               | 5            |
| Bičiková et al. 2019         | *                | **                   | *               | 4            |
| Bugajska et al.2017          | **               | **                   | *               | 5            |
| Cai et al.2016               | ***              | **                   | *               | 6            |
| Chauhan et al.2004           | **               | **                   | *               | 5            |
| Chen et al. 2016             | ****             | **                   | **              | 8            |
| Cheng et al. 2020            | ****             | **                   | **              | 8            |
| Cortelazzo et al.2016        | ***              | **                   | **              | 7            |
| Coşkun et al.2016            | ***              | **                   | *               | 6            |
| D'Eufemia et al.1995         | **               | **                   | *               | 5            |
| El-Ansary AK et al.2011      | ***              | **                   | **              | 7            |
| El-Ansary et al. 2010        | *                | **                   | *               | 4            |
| El-Ansary et al. 2016        | ***              | **                   | *               | 6            |
| El-Ansary et al. 2017        | ***              | **                   | **              | 7            |
| El-Ansary et al.2018         | ***              | **                   | **              | 7            |
| Essa et al. 2012             | **               | **                   | **              | 6            |
| Eto et al.1992               | ****             | **                   | **              | 8            |
| Fatemi et al.2002            | *                | **                   | **              | 5            |
| Feng J et al.2016            | ****             | **                   | **              | 8            |
| Garipardic et al.2017        | ***              | *                    | **              | 6            |
| Geier et al.2009             | **               | *                    | **              | 5            |
| Ghodsi et al. 2019           | *                | *                    | **              | 4            |
| Gong et al.2013              | ****             | **                   | **              | 8            |
| Grayaa et al. 2018           | **               | **                   | **              | 6            |
| Gunes et al.2017             | ***              | *                    | **              | 6            |
| Guo et al. 2018              | ****             | *                    | **              | 7            |
| Guo et al. 2019              | ***              | *                    | *               | 5            |

| <b>Between-Group Studies</b> | <b>Selection</b> | <b>Comparability</b> | <b>Exposure</b> | <b>Total</b> |
|------------------------------|------------------|----------------------|-----------------|--------------|
| Han et al.2015               | ****             | **                   | **              | 8            |
| Hassan et al.2019            | **               | **                   | **              | 6            |
| Hodgson et al. 2014          | ***              | **                   | **              | 7            |
| James et al. 2004            | ***              | **                   | **              | 7            |
| James et al.2006             | **               | **                   | *               | 5            |
| James et al. 2009            | **               | *                    | *               | 4            |
| Kim et al.2010               | ***              | **                   | *               | 6            |
| Kondolot et al.2016          | ***              | **                   | **              | 7            |
| Li SO et al.2014             | **               | **                   | **              | 6            |
| Main et al. 2014             | *                | *                    | *               | 3            |
| Meguid et al.2010            | ****             | *                    | **              | 7            |
| Meguid et al.2011            | ***              | **                   | **              | 7            |
| Melnyk et al.2012            | ***              | *                    | **              | 6            |
| Mostafa et al. 2010          | **               | **                   | **              | 6            |
| Mostafa et al.2012           | **               | **                   | *               | 5            |
| Ning et al. 2018             | ****             | **                   | *               | 7            |
| Oshodi et al. 2017           | ***              | **                   | *               | 6            |
| Parellada et al.2012         | ***              | **                   | *               | 6            |
| Pasca et al.2006             | *                | **                   | **              | 5            |
| Paşca et al.2009             | ***              | **                   | **              | 7            |
| Ramaekers et al.2013         | *                | **                   | *               | 4            |
| Rose et al. 2012             | **               | **                   | *               | 5            |
| Russo et al. 2011            | ***              | **                   | *               | 6            |
| Saad et al. 2016             | ***              | **                   | *               | 6            |
| Saad et al.2017              | **               | **                   | **              | 6            |
| Saha et al.2019              | **               | *                    | **              | 5            |
| Shimmura et al.2011          | **               | **                   | *               | 5            |
| Skalny et al.2017(a)         | ***              | **                   | **              | 7            |
| Skalny et al.2017(b)         | *                | **                   | **              | 5            |
| Söğüt et al.2003             | **               | **                   | **              | 6            |
| Suh et al.2008               | **               | **                   | *               | 5            |
| Sun et al. 2016              | ***              | **                   | **              | 7            |
| Sweeten et al.2004           | ***              | **                   | *               | 6            |
| Sweetman et al.2019          | ***              | **                   | *               | 6            |
| Tirouvanziam et al.2011      | ***              | **                   | *               | 6            |
| Tostes et al.2012            | *                | **                   | *               | 4            |
| Tu et al.2013                | ***              | **                   | *               | 6            |
| Vergani et al.2011           | *                | **                   | *               | 4            |
| Wang et al.2016              | ***              | **                   | **              | 7            |
| Yektas et al.2019            | **               | *                    | **              | 5            |

| <b>Between-Group Studies</b> | <b>Selection</b> | <b>Comparability</b> | <b>Exposure</b> | <b>Total</b> |
|------------------------------|------------------|----------------------|-----------------|--------------|
| Yenkoyan et al. 2018         | **               | **                   | *               | 5            |
| Yorbik et al.2002            | **               | **                   | *               | 5            |
| Yui et al. 2016(a)           | ***              | **                   | **              | 7            |
| Yui et al.2016(b)            | ****             | **                   | **              | 8            |
| Yui et al.2016(c)            | ***              | **                   | *               | 6            |
| Yui et al. 2017              | **               | **                   | *               | 5            |
| Zaki et al.2017              | ***              | **                   | *               | 6            |
| Zhang et al.2015             | **               | **                   | *               | 5            |
| Zhou W et al.2018            | ***              | **                   | **              | 7            |

**eTable 3.** Sub-group analysis stratified by source of healthy volunteer for homocysteine, methionine, vitamin B9, vitamin B12, vitamin D and GSH.

| Marker       | Subgroup                    | Main Effect              |         |                | Heterogeneity      |           |                |                                 |
|--------------|-----------------------------|--------------------------|---------|----------------|--------------------|-----------|----------------|---------------------------------|
|              |                             | Hedges <i>g</i> (95% CI) | Z Score | <i>P</i> Value | <i>Q</i> Statistic | <i>df</i> | <i>P</i> Value | <i>I</i> <sup>2</sup> Statistic |
| Homocysteine | Clinical center             | 0.874(0.618 to 1.131)    | 6.684   | <.001          | 158.361            | 4         | <.001          | 97.474                          |
|              | Kindergarten/Primary School | 0.558(0.428 to 0.688)    | 8.404   | <.001          | 74.798             | 6         | <.001          | 91.978                          |
| Methionine   | Local community             | -0.319(-0.576 to -0.062) | -2.429  | 0.015          | 9.480              | 2         | 0.009          | 78.903                          |
| Vitamin B9   | Clinical center             | -0.897(-1.188 to -0.606) | -6.038  | <.001          | 126.912            | 3         | <.001          | 97.636                          |
|              | Local community             | -0.232(-0.400 to -0.064) | -2.705  | 0.007          | 7.677              | 4         | 0.104          | 47.896                          |
| Vitamin B12  | Clinical center             | -0.520(-0.768 to -0.272) | -4.106  | <.001          | 13.291             | 3         | 0.004          | 77.429                          |
|              | Local community             | 0.052(-0.111 to 0.216)   | 0.628   | 0.530          | 19.837             | 4         | 0.001          | 79.836                          |
| Vitamin D    | Clinical center             | -0.382(-0.499 to -0.265) | -6.389  | <.001          | 18.428             | 3         | <.001          | 83.720                          |
|              | Kindergarten/Primary School | -0.677(-0.911 to -0.444) | -5.682  | <.001          | 1.635              | 2         | 0.441          | 0.000                           |
|              | Local community             | -0.060(-0.223 to 0.103)  | -0.721  | 0.471          | 44.361             | 3         | <.001          | 93.237                          |
| GSH          | Clinical center             | -0.292(-0.542 to -0.043) | -2.294  | 0.022          | 6.028              | 3         | 0.110          | 50.235                          |
|              | Local community             | -1.141(-1.380 to -0.901) | -9.316  | <.001          | 12.806             | 2         | 0.002          | 84.382                          |

Abbreviations: *df*, degrees of freedom; ASD, Autism spectrum disorder; GSH, Reduced glutathione.



eFigure 1

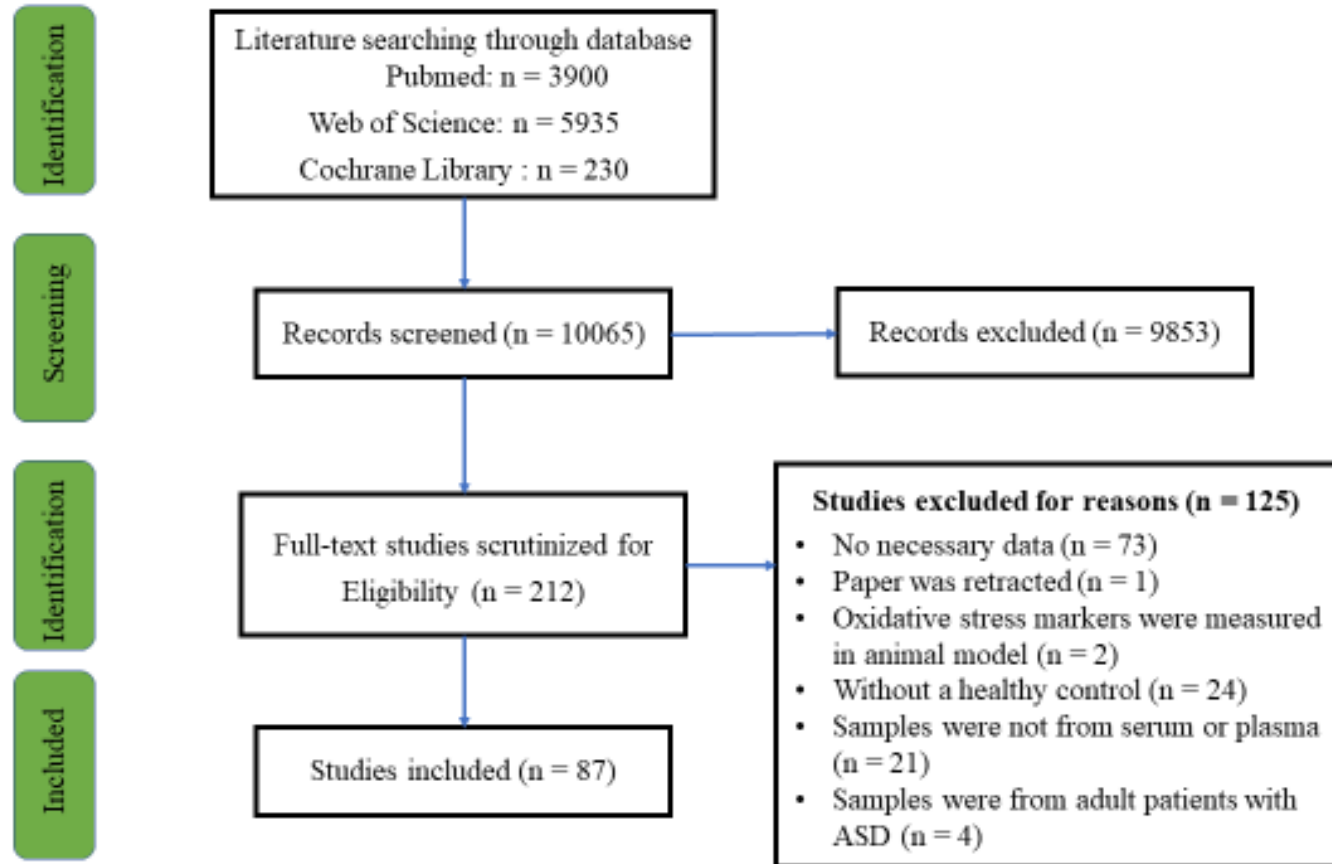

eFigure 2

A

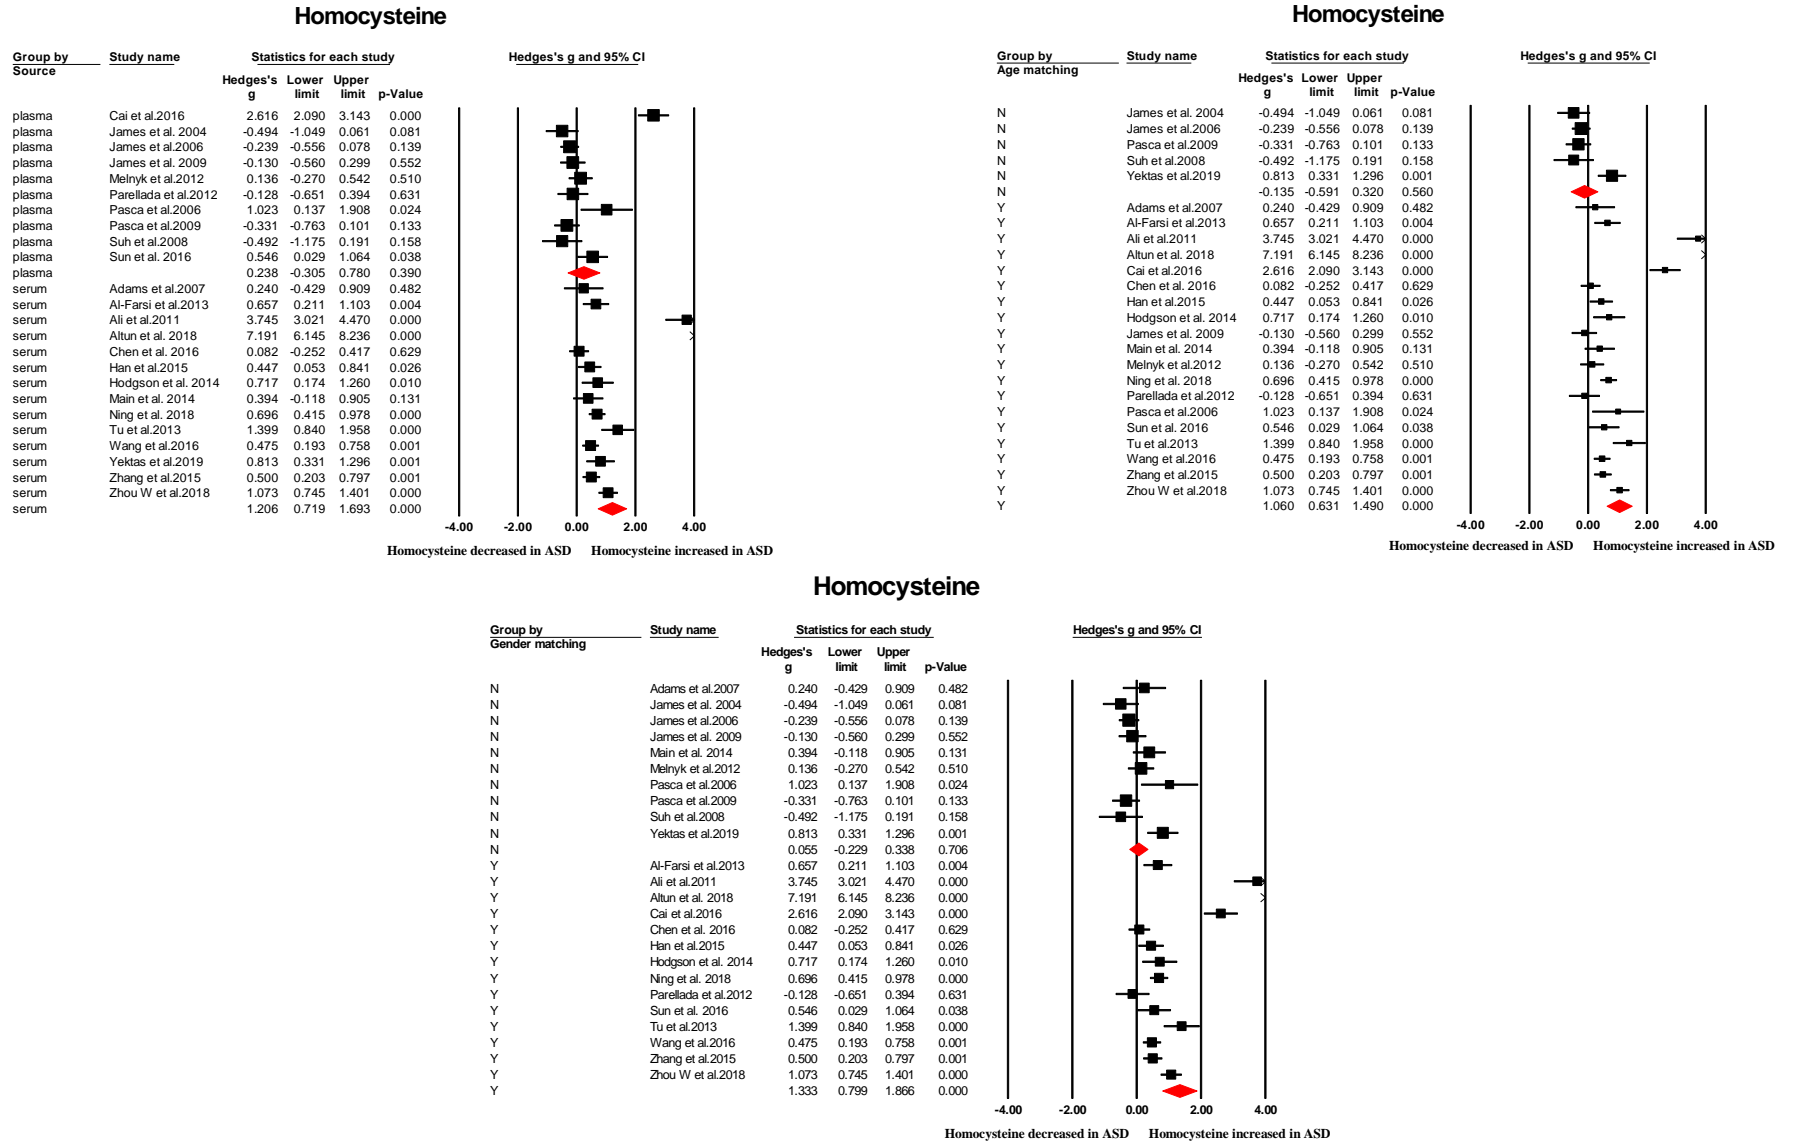

Forrest plot showing pooled results comparing homocysteine levels between ASD patients and HC subjects stratified by source of sampling (plasma heterogeneity:  $Q = 111.997$ ,  $P < 0.001$ ,  $I^2 = 91.964$ , 10 studies; and serum heterogeneity:  $Q = 248.685$ ,  $P < 0.001$ ,  $I^2 = 94.773$ , 14 studies), age matching (N heterogeneity:  $Q = 18.688$ ,  $P = 0.001$ ,  $I^2 = 78.596$ , 5 studies; and Y heterogeneity:  $Q = 332.029$ ,  $P < 0.001$ ,  $I^2 = 94.579$ , 19 studies) and gender matching (N heterogeneity:  $Q = 29.061$ ,  $P < 0.001$ ,  $I^2 = 69.031$ , 10 studies; and Y heterogeneity:  $Q = 303.569$ ,  $P < 0.001$ ,  $I^2 = 95.718$ , 14 studies). The sizes of the squares are proportional to study weights.

eFigure 2

B

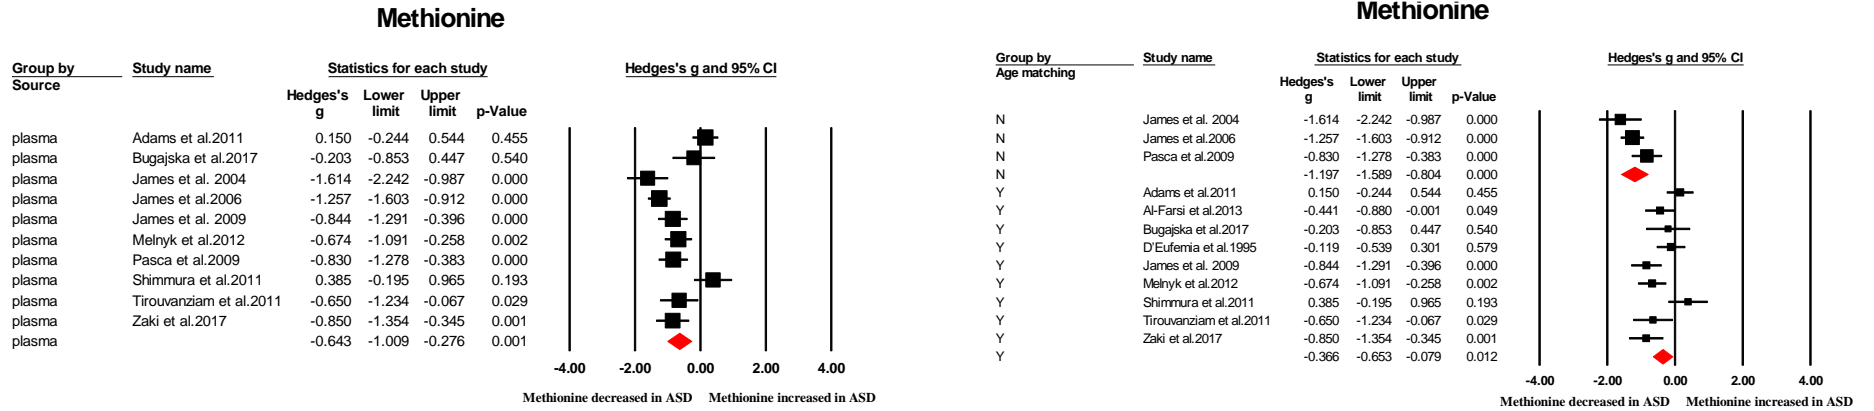

**Methionine**

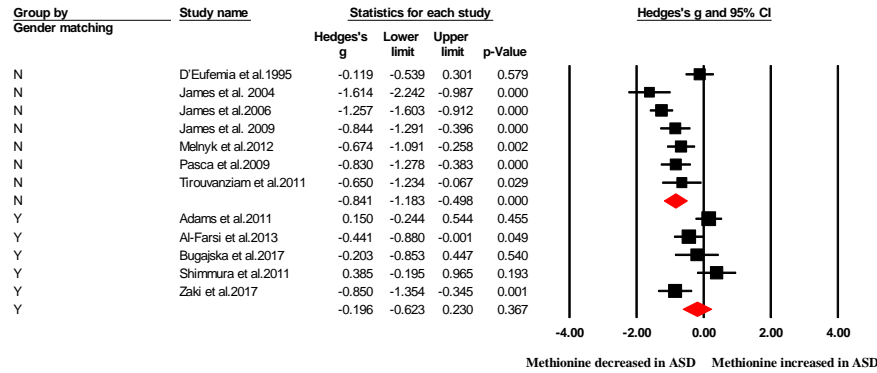

Forrest plot showing pooled results comparing plasma methionine levels (heterogeneity  $Q = 52.702$ ,  $P < 0.001$ ,  $I^2 = 82.923$ , 10 studies), age matching (N heterogeneity:  $Q = 4.375$ ,  $P = 0.112$ ,  $I^2 = 54.291$ , 3 studies; and Y heterogeneity:  $Q = 25.631$ ,  $P = 0.001$ ,  $I^2 = 68.788$ , 9 studies) and gender matching (N heterogeneity:  $Q = 23.760$ ,  $P = 0.001$ ,  $I^2 = 74.747$ , 7 studies; and Y heterogeneity:  $Q = 14.472$ ,  $P = 0.006$ ,  $I^2 = 72.361$ , 5 studies) between ASD patients and HC subjects. The sizes of the squares are proportional to study weights.

eFigure 2

C

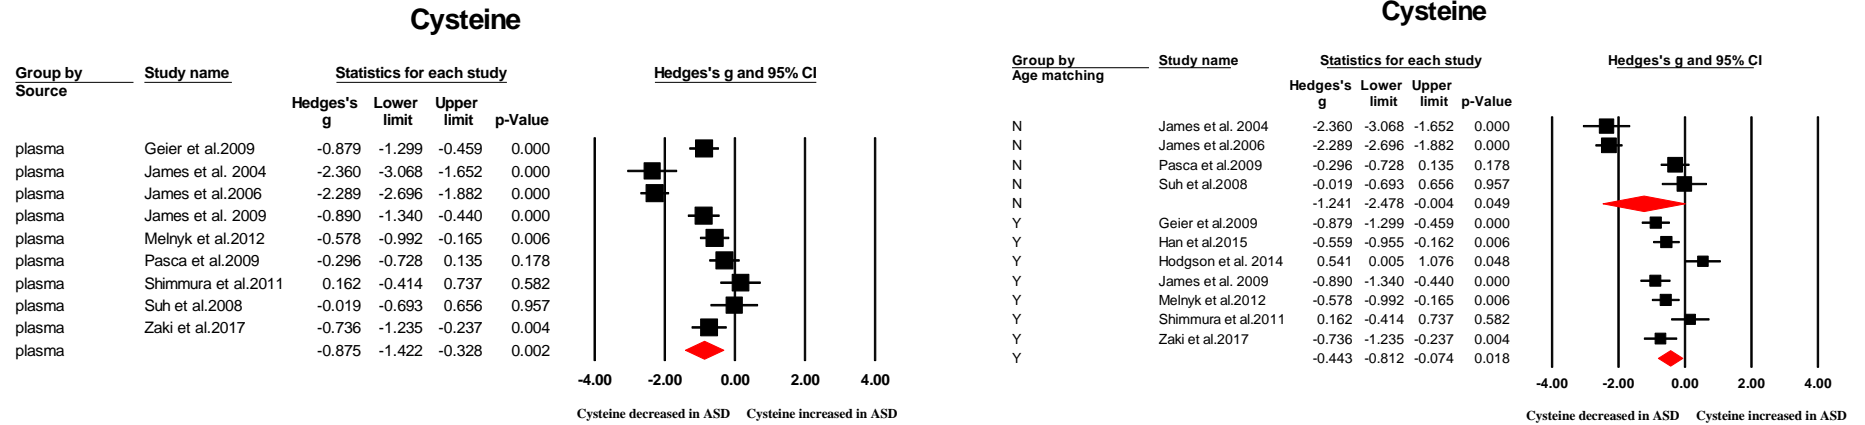

### Cysteine

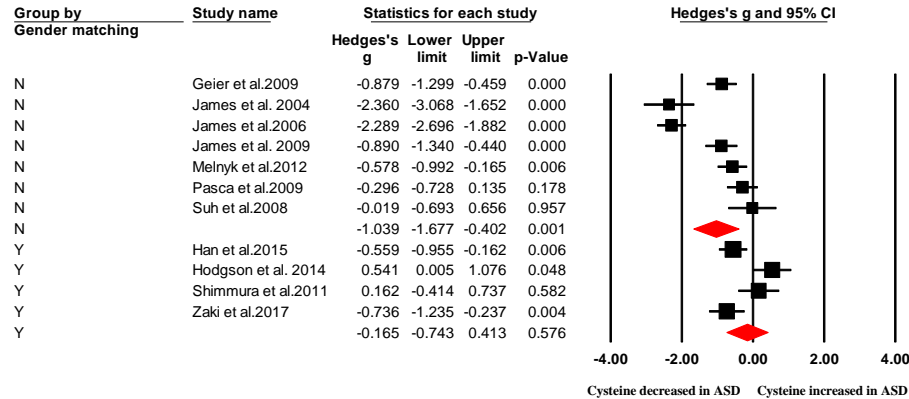

Forrest plot showing pooled results comparing plasma Cysteine levels (heterogeneity  $Q = 91.02$ ,  $P < 0.001$ ,  $I^2 = 91.211$ , 9 studies), age matching (N heterogeneity:  $Q = 65.923$ ,  $P < 0.001$ ,  $I^2 = 95.449$ , 4 studies; and Y heterogeneity:  $Q = 26.673$ ,  $P < 0.001$ ,  $I^2 = 77.505$ , 7 studies) and gender matching (N heterogeneity:  $Q = 75.520$ ,  $P < 0.001$ ,  $I^2 = 92.055$ , 7 studies; and Y heterogeneity:  $Q = 16.306$ ,  $P = 0.001$ ,  $I^2 = 81.602$ , 4 studies) between ASD patients and HC subjects. The sizes of the squares are proportional to study weights.

eFigure 2

D

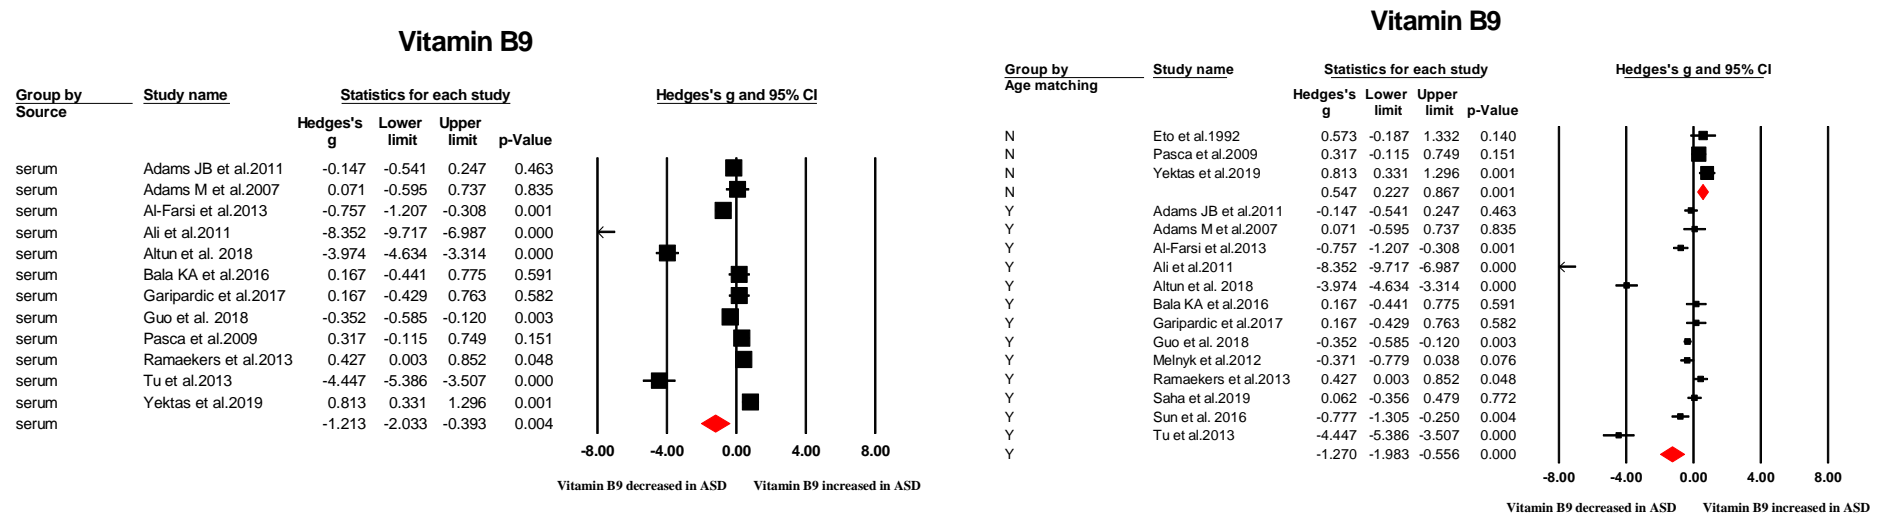

### Vitamin B9

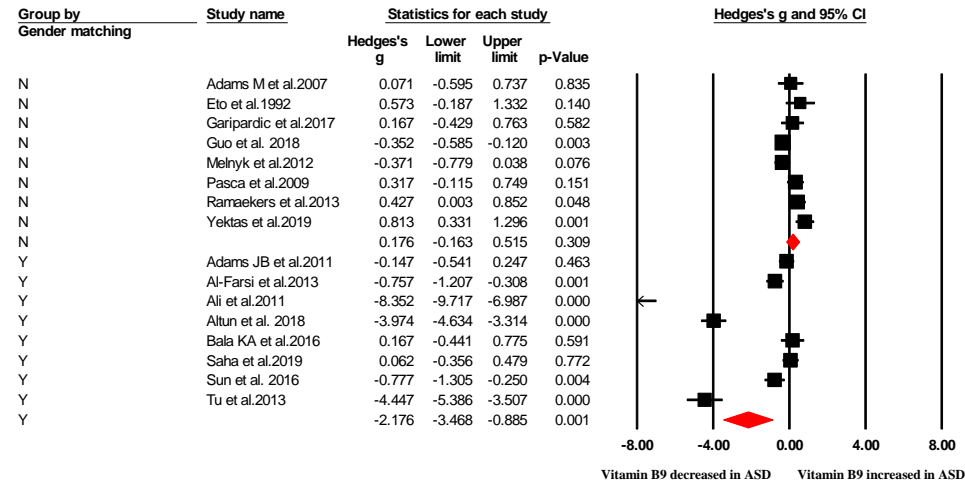

Forrest plot showing pooled results comparing serum vitamin B9 levels (heterogeneity:  $Q = 376.382$ ,  $P < 0.001$ ,  $I^2 = 97.077$ , 12 studies), age matching (N heterogeneity:  $Q = 2.263$ ,  $P = 0.323$ ,  $I^2 = 11.631$ , 3 studies; and Y heterogeneity:  $Q = 346.128$ ,  $P < 0.001$ ,  $I^2 = 96.533$ , 13 studies) and gender matching (N heterogeneity:  $Q = 31.353$ ,  $P < 0.001$ ,  $I^2 = 77.674$ , 8 studies; and Y heterogeneity:  $Q = 299.251$ ,  $P < 0.001$ ,  $I^2 = 97.661$ , 8 studies) between ASD patients and HC subjects. The sizes of the squares are proportional to study weights.

eFigure 2

E

Vitamin B12

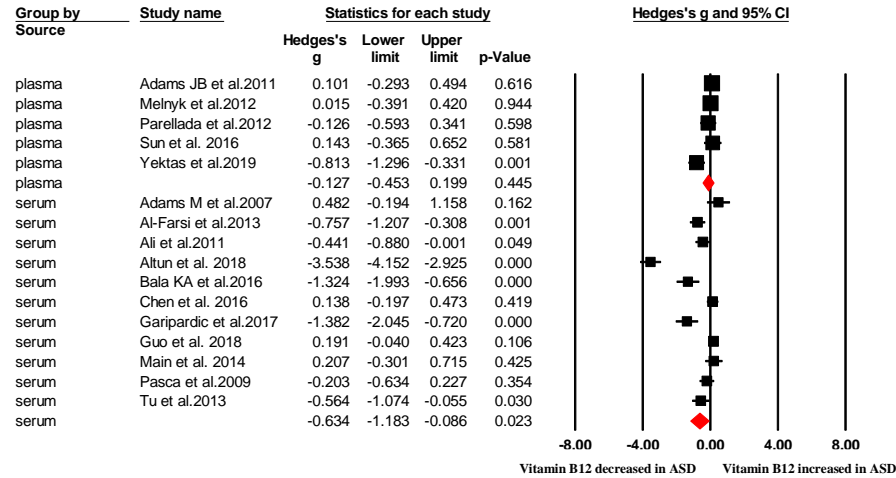

Vitamin B12

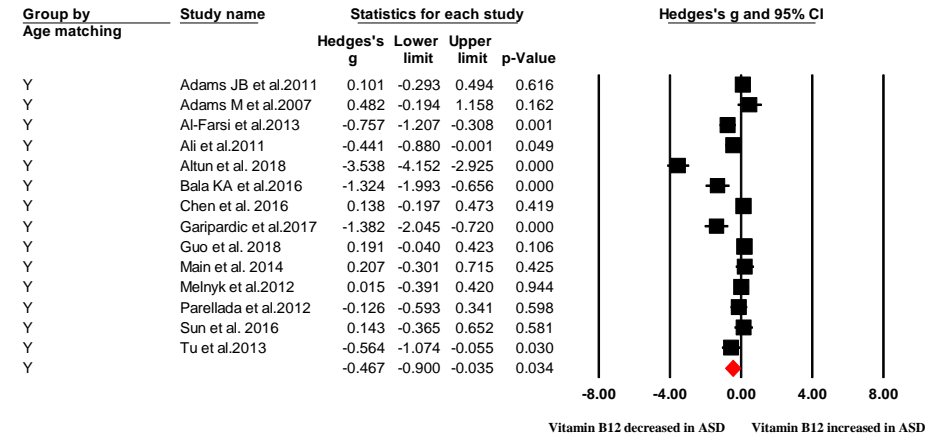

Vitamin B12

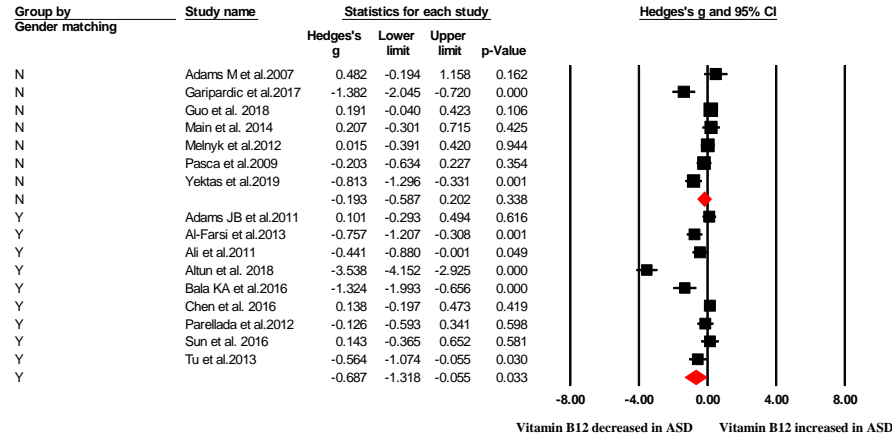

Forrest plot showing pooled results comparing vitamin B9 levels between ASD patients and HC subjects stratified by source of sampling (plasma heterogeneity:  $Q = 10.578$ ,  $P = 0.032$ ,  $I^2 = 62.187$ , 5 studies; and serum heterogeneity:  $Q = 164.768$ ,  $P < 0.001$ ,  $I^2 = 93.931$ , 11 studies), age matching (Y heterogeneity:  $Q = 172.258$ ,  $P < 0.001$ ,  $I^2 = 92.453$ , 14 studies) and gender matching (N heterogeneity:  $Q = 33.251$ ,  $P < 0.001$ ,  $I^2 = 81.956$ , 7 studies; and Y heterogeneity:  $Q = 132.385$ ,  $P < 0.001$ ,  $I^2 = 93.957$ , 9 studies) between ASD patients and HC subjects. The sizes of the squares are proportional to study weights.

eFigure 2

F

Vitamin D

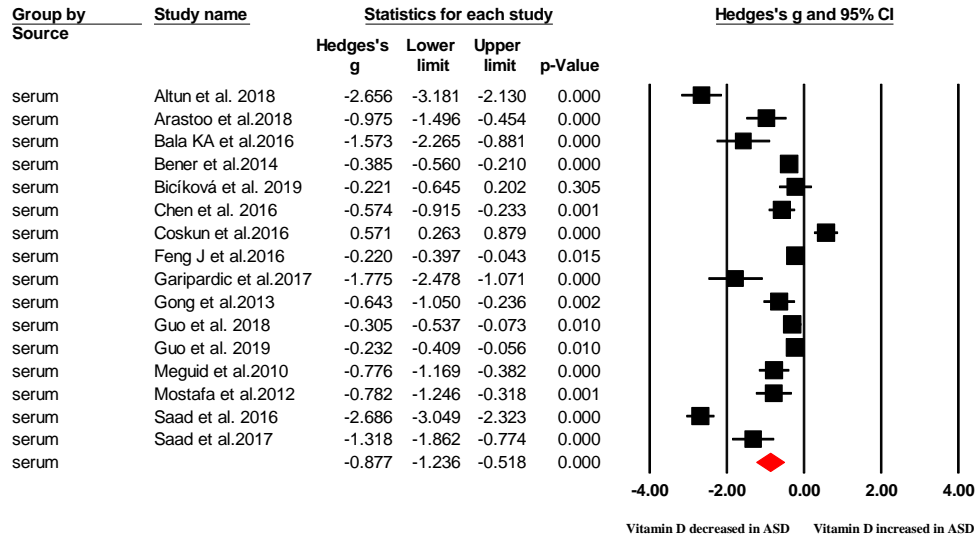

Vitamin D

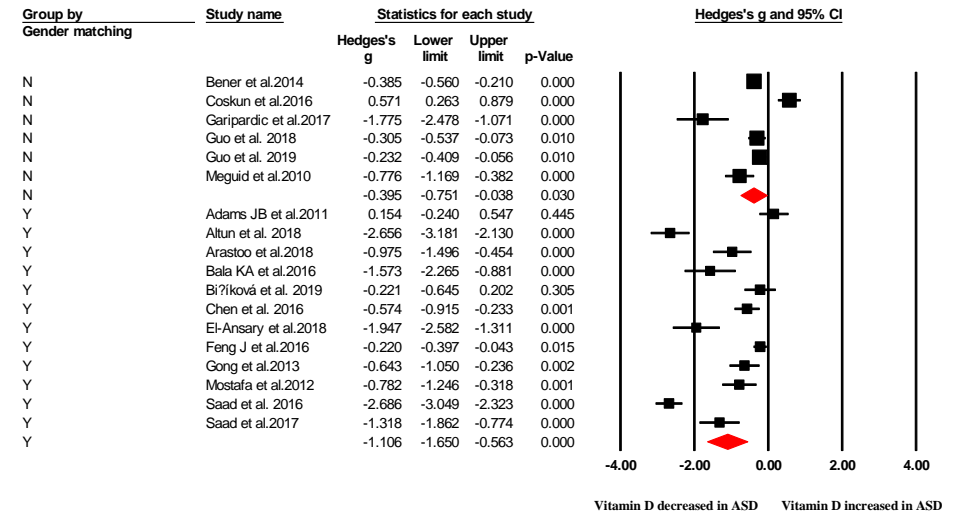

Forrest plot showing pooled results comparing serum vitamin D levels (heterogeneity:  $Q = 312.387, P < 0.001, I^2 = 95.198$ , 15 studies) and gender matching (N heterogeneity:  $Q = 54.444, P < 0.001, I^2 = 90.816$ , 6 studies; and Y heterogeneity:  $Q = 245.413, P < 0.001, I^2 = 95.518$ , 12 studies) between ASD patients and HC subjects. The sizes of the squares are proportional to study weights.

eFigure 2

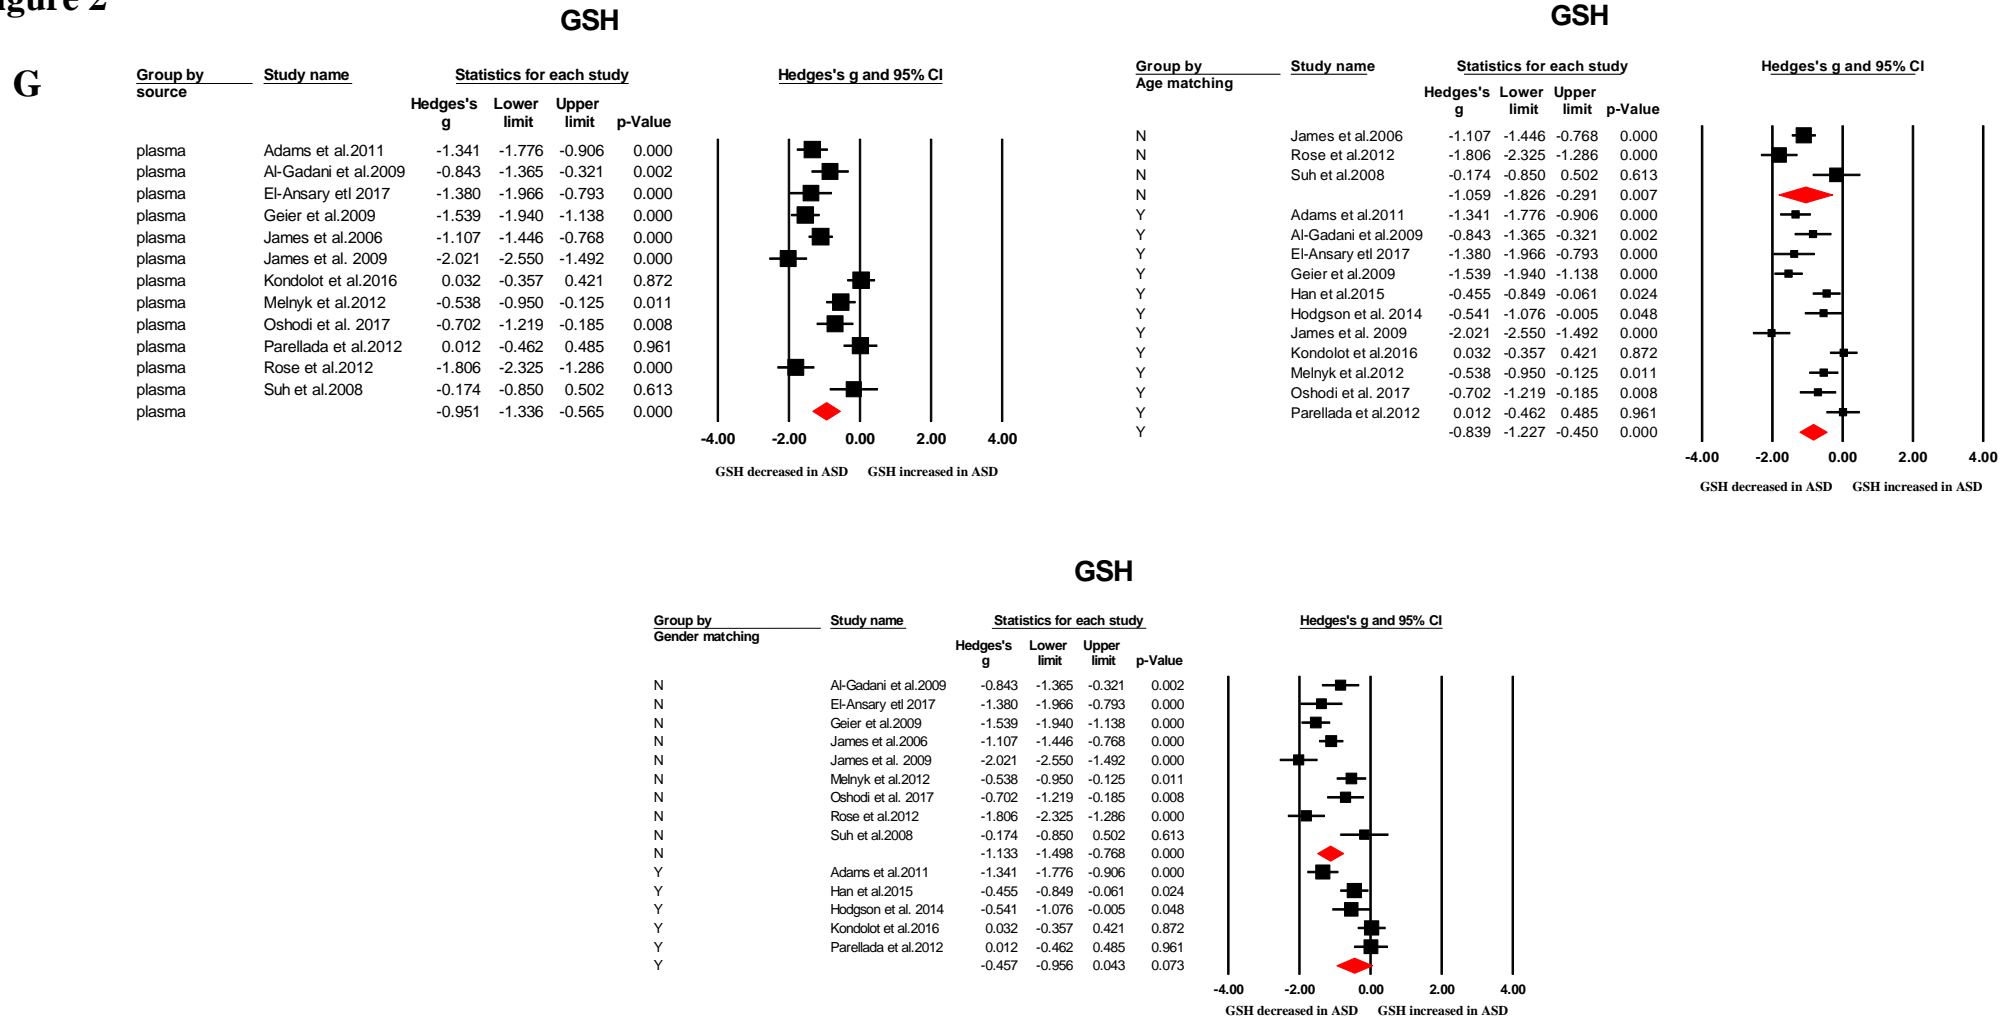

Forrest plot showing pooled results comparing plasma GSH levels (heterogeneity:  $Q = 90.649$ ,  $P < 0.001$ ,  $I^2 = 87.865$ , 12 studies), age matching (N heterogeneity:  $Q = 14.173$ ,  $P = 0.001$ ,  $I^2 = 85.889$ , 3 studies; and Y heterogeneity:  $Q = 77.621$ ,  $P < 0.001$ ,  $I^2 = 87.117$ , 11 studies) and gender matching (N heterogeneity:  $Q = 41.470$ ,  $P < 0.001$ ,  $I^2 = 80.709$ , 9 studies; and Y heterogeneity:  $Q = 25.738$ ,  $P < 0.001$ ,  $I^2 = 84.459$ , 5 studies) between ASD patients and HC subjects. The sizes of the squares are proportional to study weights.



eFigure 3

# Meta-regression for Homocysteine

A

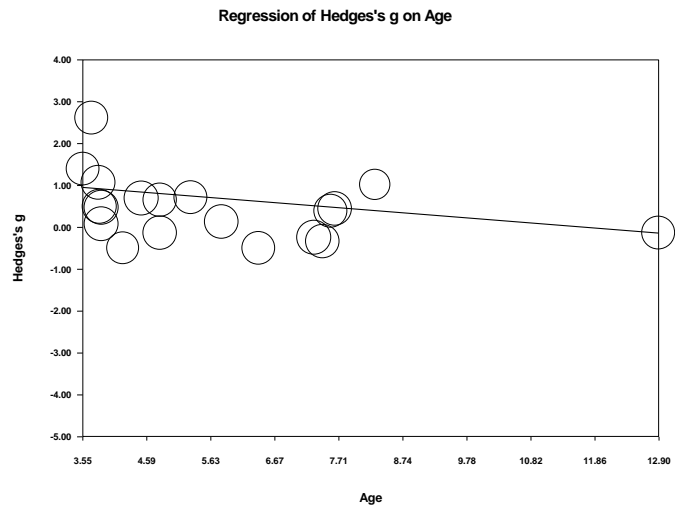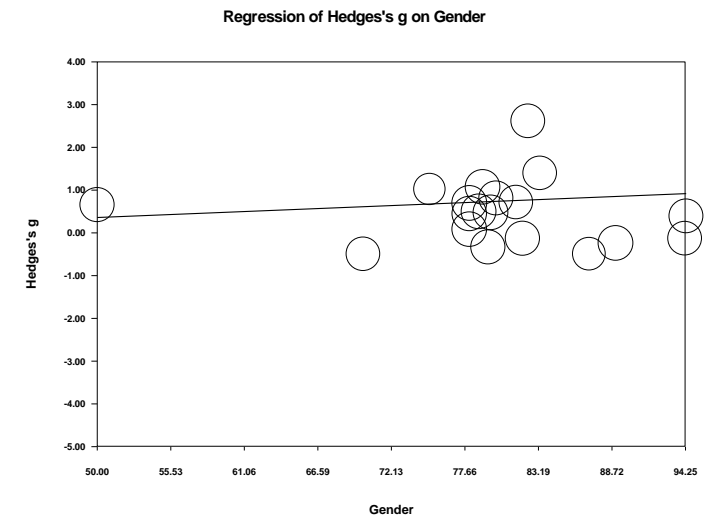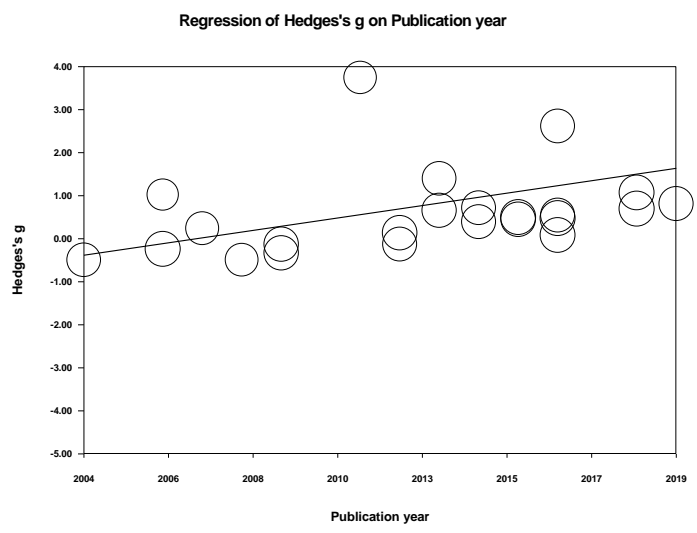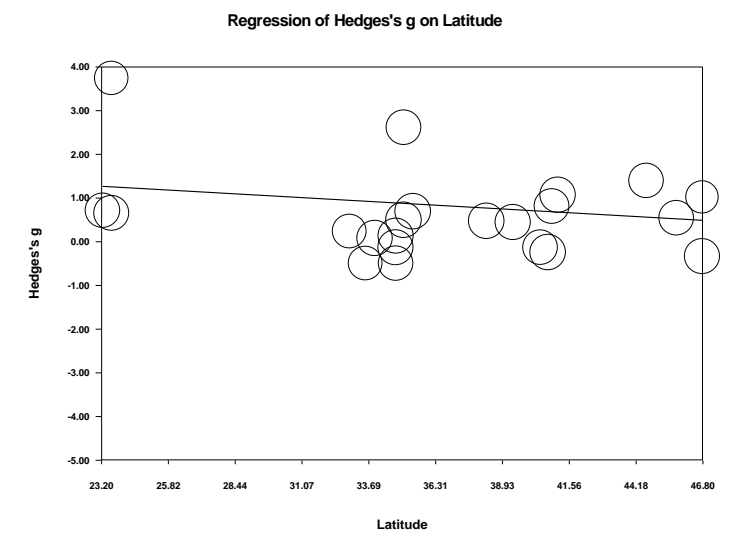

Association between age (Regression coefficient[SE]: -0.1168 [0.0871], 95%CI: -0.2875 to 0.0539, p = 0.1800), gender (Regression coefficient[SE]: 0.0126 [0.0225], 95%CI: -0.0314 to 0.0567, p = 0.5744), publication year (Regression coefficient[SE]: 0.1346 [0.0425], 95%CI: 0.0513 to 0.2179, p = 0.0015), latitude (Regression coefficient [SE]: -0.0330 [0.0306], 95% CI: -0.0929 to 0.0270, p = 0.2809) and effective size (Hedges's g) for homocysteine.

eFigure 3

# Meta-regression for Methionine

B

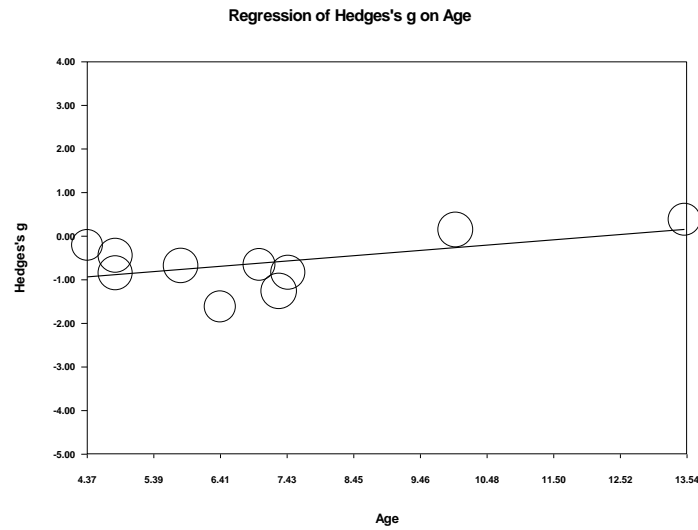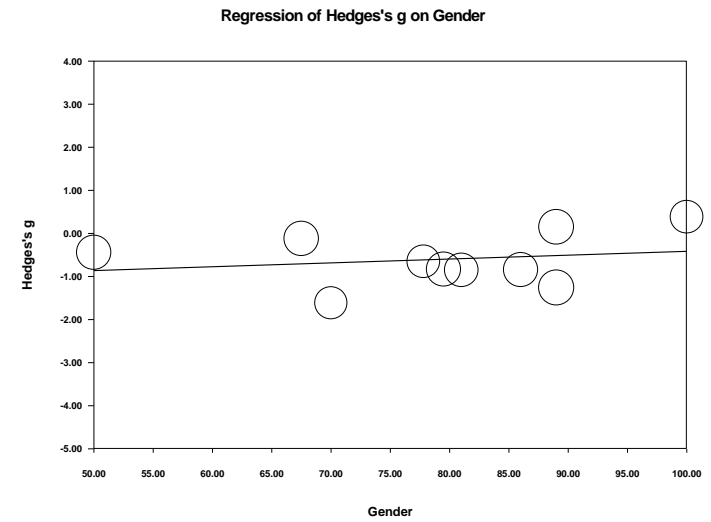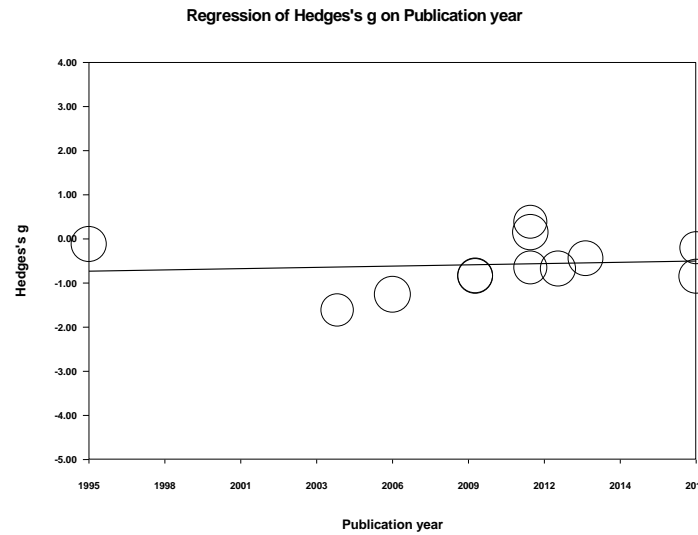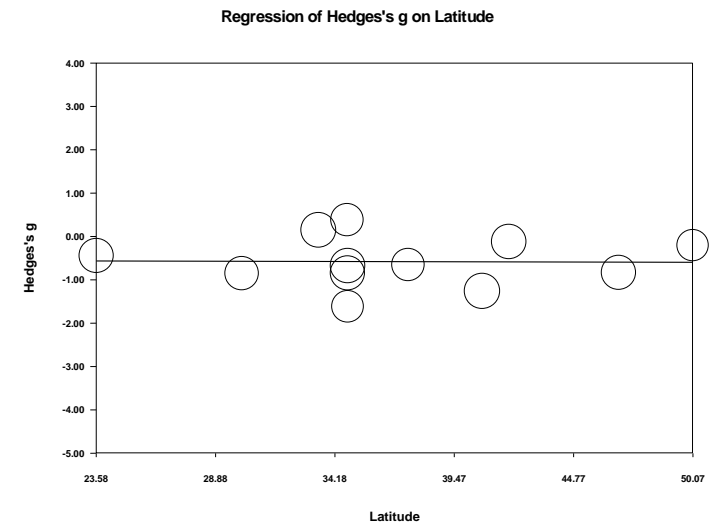

Association between age (Regression coefficient[SE]: 0.1191 [0.0640], 95% CI: -0.0064 to 0.2446,  $p = 0.0628$ ), gender (Regression coefficient[SE]: 0.0089 [0.0152], 95% CI: -0.0208 to 0.0387,  $p = 0.5560$ ), publication year (Regression coefficient[SE]: 0.0104 [0.0295], 95% CI: -0.0473 to 0.0682,  $p = 0.7232$ ), latitude (Regression coefficient[SE]: -0.0011 [0.0245], 95% CI: -0.0492 to 0.0470,  $p = 0.9635$ ) and effective size (Hedges's g) for methionine.

eFigure 3

# Meta-regression for Cysteine

C

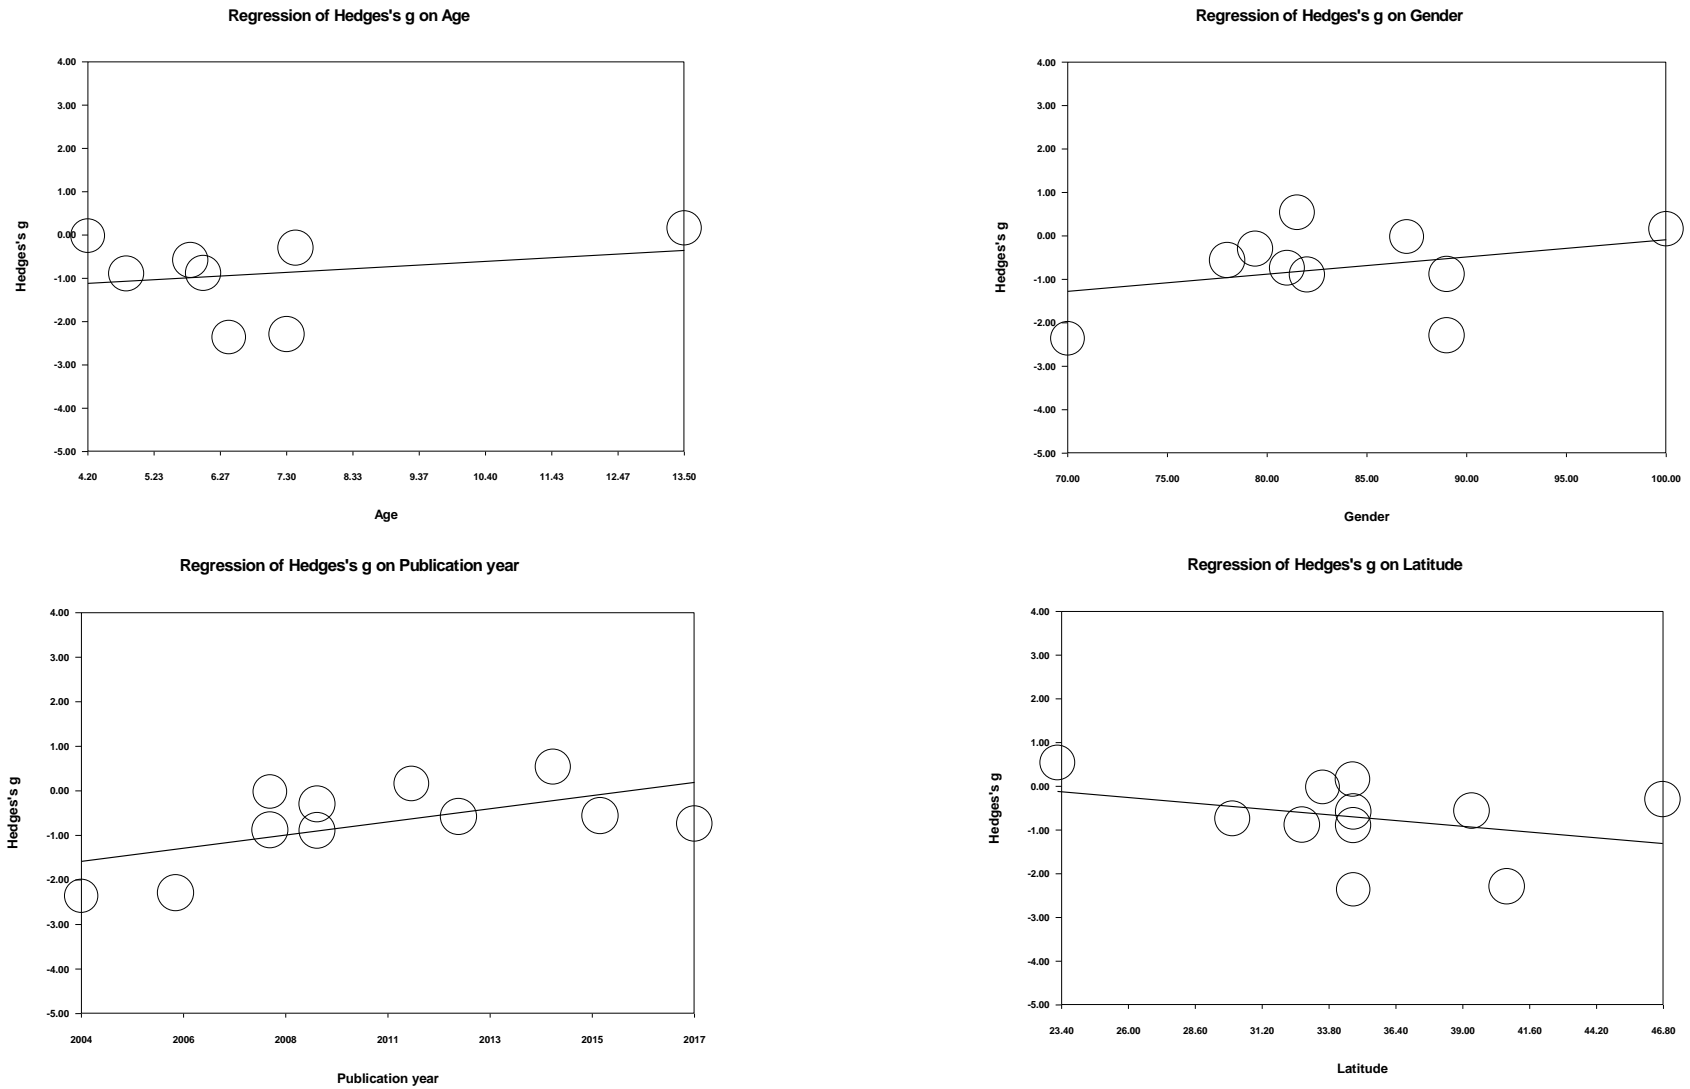

Association between age (Regression coefficient[SE]: 0.0457 [0.1188], 95%CI: -0.1871 to 0.2785,  $p = 0.7005$ ), gender (Regression coefficient[SE]: 0.0396 [0.0395], 95%CI: -0.0377 to 0.1169,  $p = 0.3155$ ), publication year (Regression coefficient[SE]: 0.1363 [0.0579], 95%CI: 0.0229 to 0.2498,  $p = 0.0185$ ), latitude (Regression coefficient[SE]: -0.0506 [0.0440], 95%CI: -0.1369 to 0.0356,  $p = 0.2500$ ) and effective size (Hedges's g) for cysteine.

eFigure 3

# Meta-regression for Vitamin B9

D

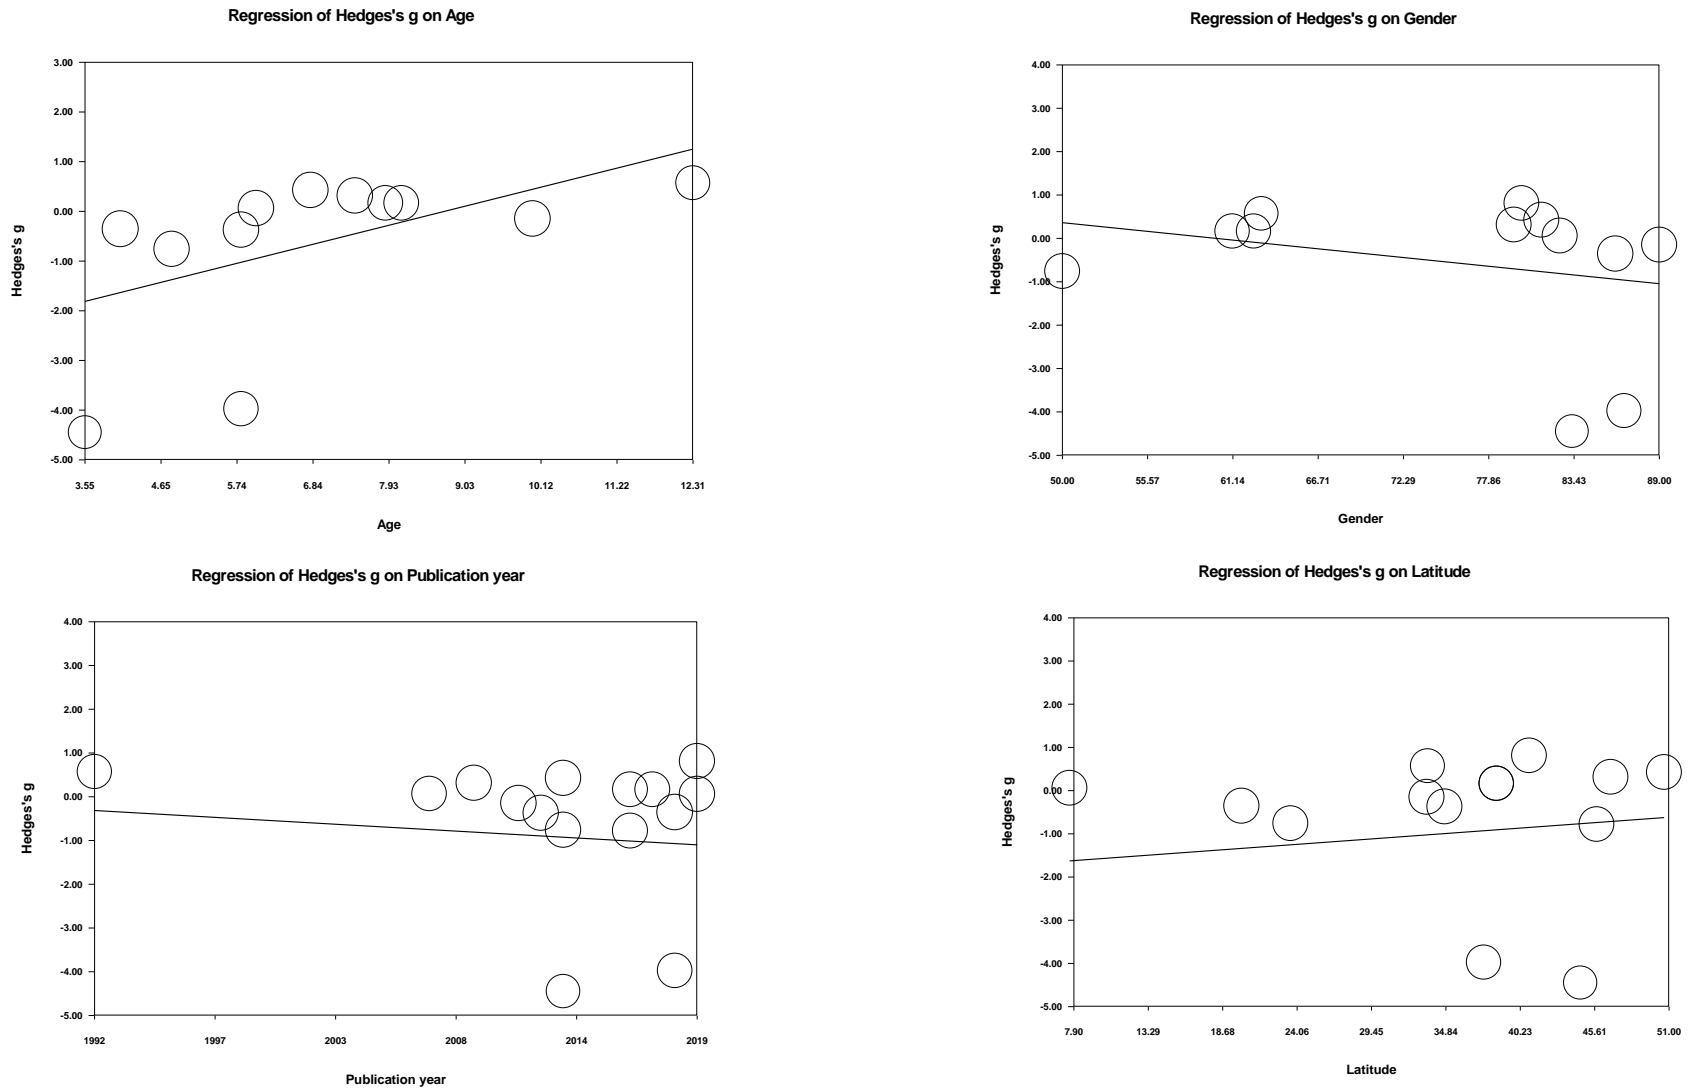

Association between age (Regression coefficient[SE]: 0.3497 [0.1331], 95%CI: 0.0889 to 0.6105,  $p = 0.0086$ ), gender (Regression coefficient[SE]: -0.0361 [0.0281], 95%CI: -0.0911 to 0.0189,  $p = 0.1985$ ), publication year (Regression coefficient[SE]: -0.0291 [0.0511], 95%CI: -0.1292 to 0.0710,  $p = 0.5688$ ), latitude (Regression coefficient[SE]: 0.0233 [0.0311], 95%CI: -0.0376 to 0.0842,  $p = 0.4532$ ) and effective size (Hedges's g) for vitamin B9.

eFigure 3

### Meta-regression for Vitamin B12

E

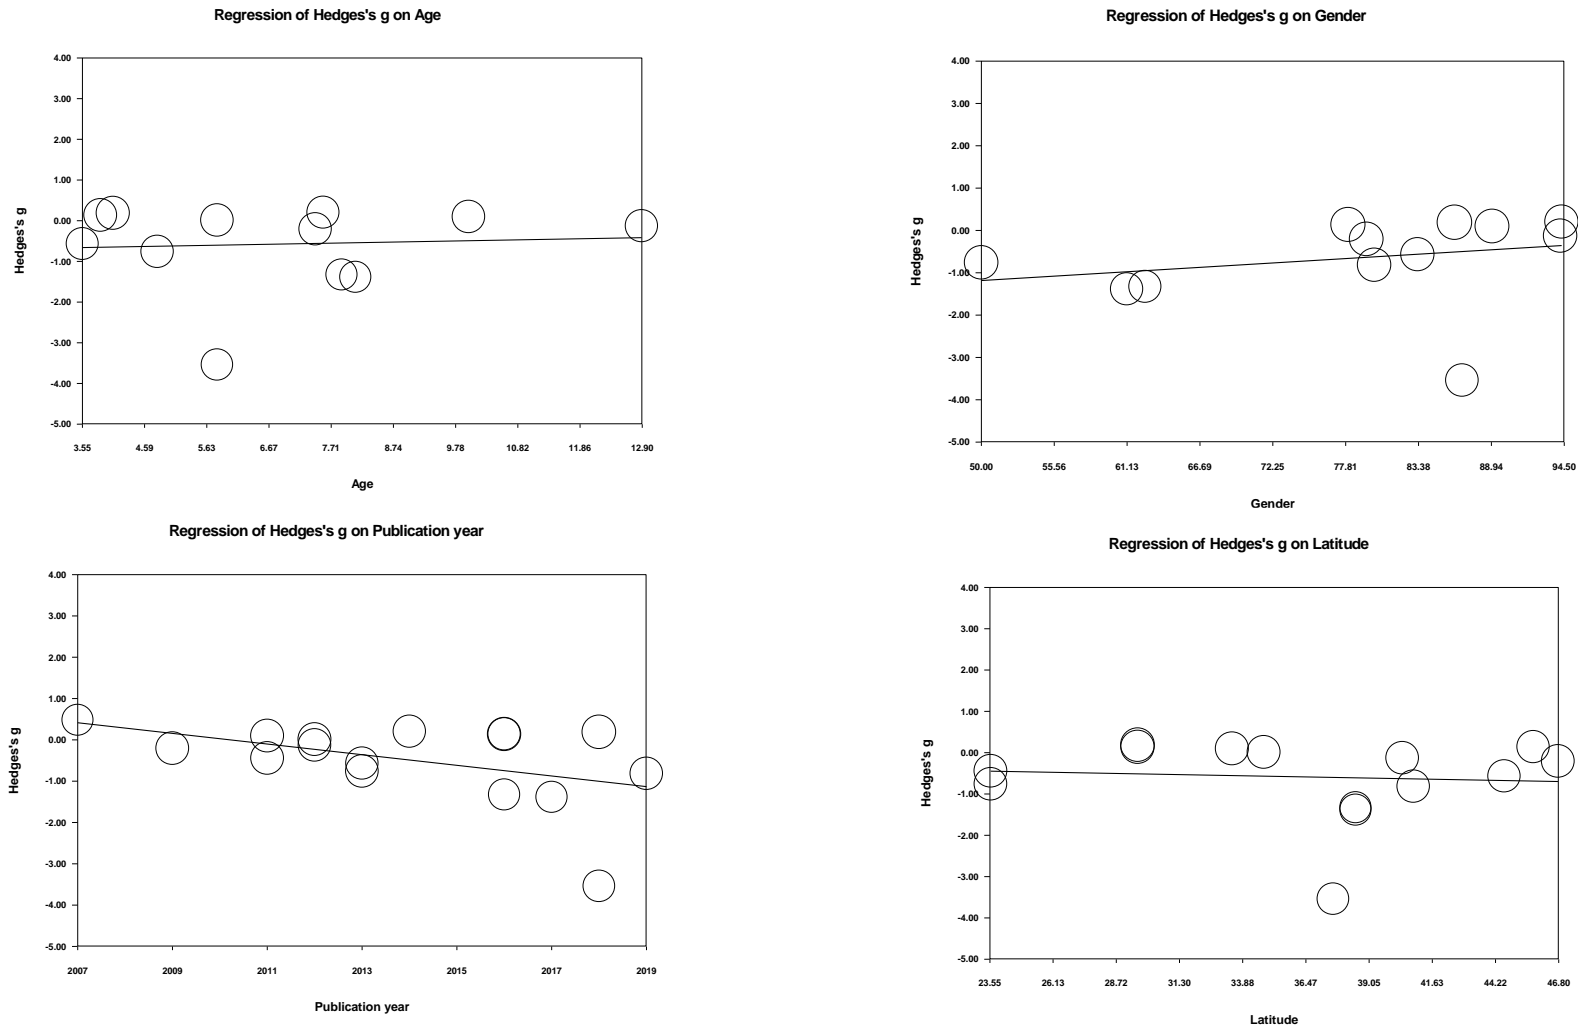

Association between age (Regression coefficient[SE]: 0.0260 [0.0977], 95%CI: -0.1656 to 0.2175,  $p = 0.7905$ ), gender (Regression coefficient[SE]: 0.0187 [0.0187], 95%CI: -0.0180 to 0.0554,  $p = 0.3184$ ), publication year (Regression coefficient[SE]: -0.1290 [0.0612], 95%CI: -0.2489 to -0.0091,  $p = 0.0350$ ), latitude (Regression coefficient[SE]: -0.0108 [0.0300], 95%CI: -0.0696 to 0.0480,  $p = 0.7196$ ) and effective size (Hedges's g) for vitamin B12.

eFigure 3

### Meta-regression for Vitamin D

F

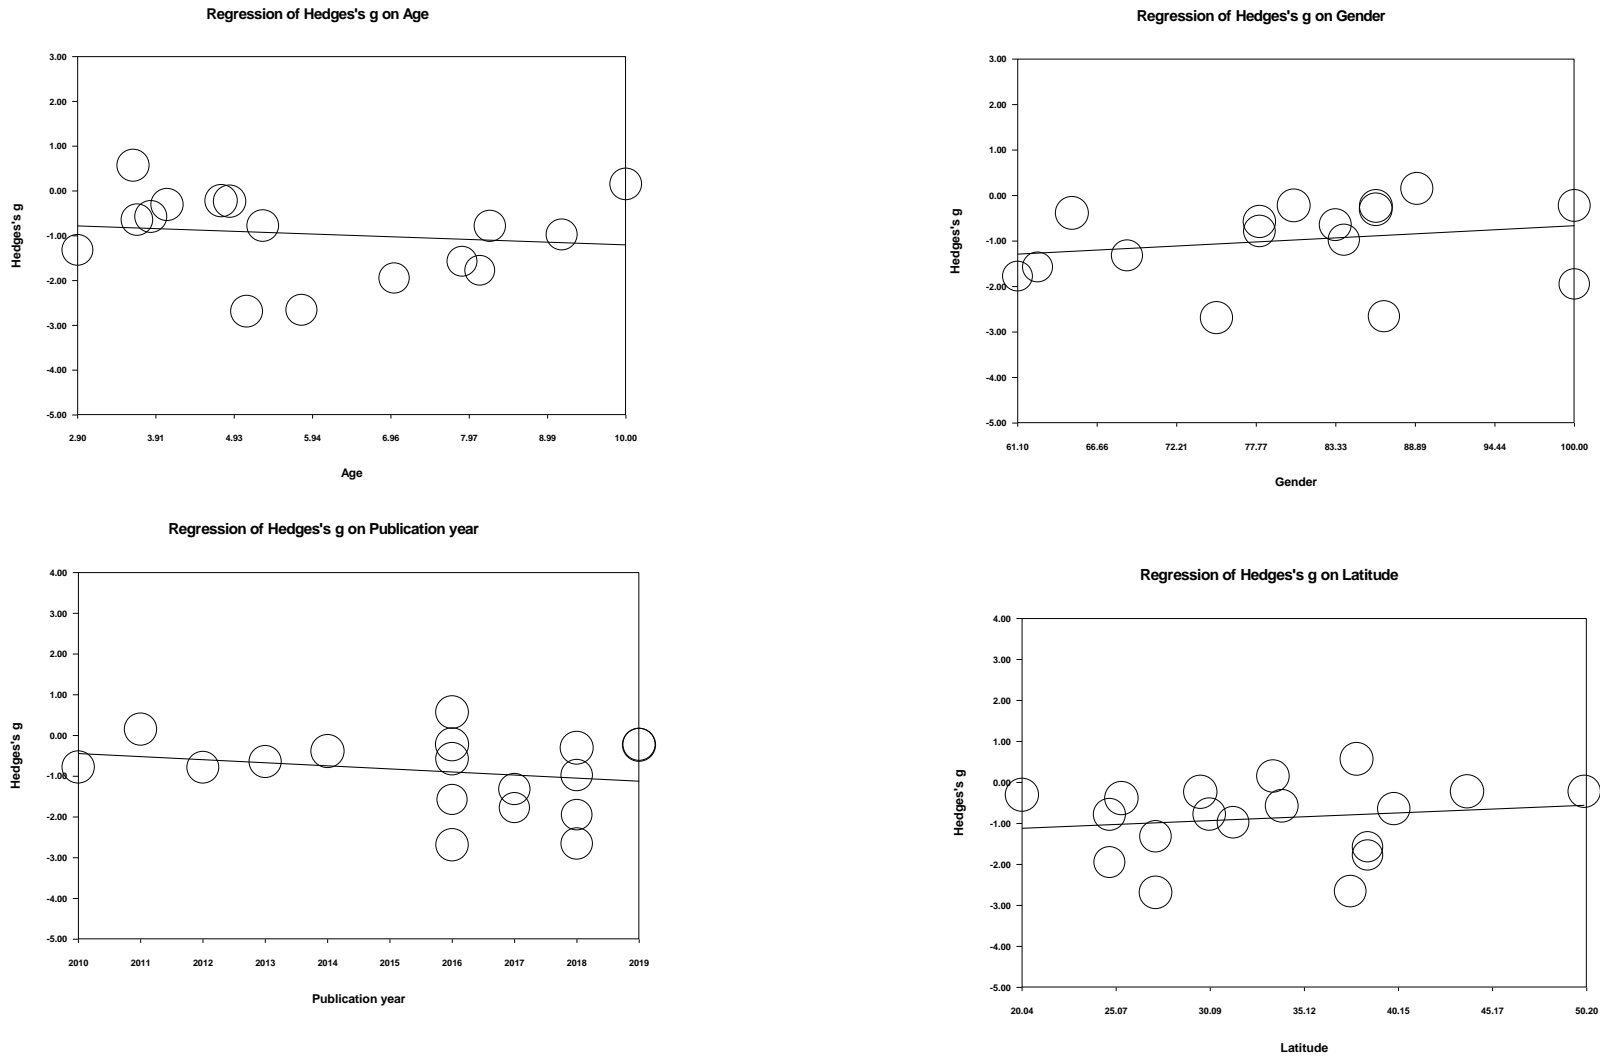

Association between age (Regression coefficient [SE]: -0.0597 [0.0986], 95%CI: -0.2530 to 0.1337,  $p = 0.5453$ ), gender (Regression coefficient [SE]: 0.0161 [0.0174], 95%CI: -0.0180 to 0.0501,  $p = 0.3559$ ), publication year (Regression coefficient[SE]: -0.0754 [0.0697], 95%CI: -0.2121 to 0.0613,  $p = 0.2794$ ), latitude (Regression coefficient[SE]: 0.0187 [0.0245], 95%CI: -0.0293 to 0.0666,  $p = 0.4460$ ) and effective size (Hedges'sg) for vitamin D.

eFigure 3

# Meta-regression for GSH

G

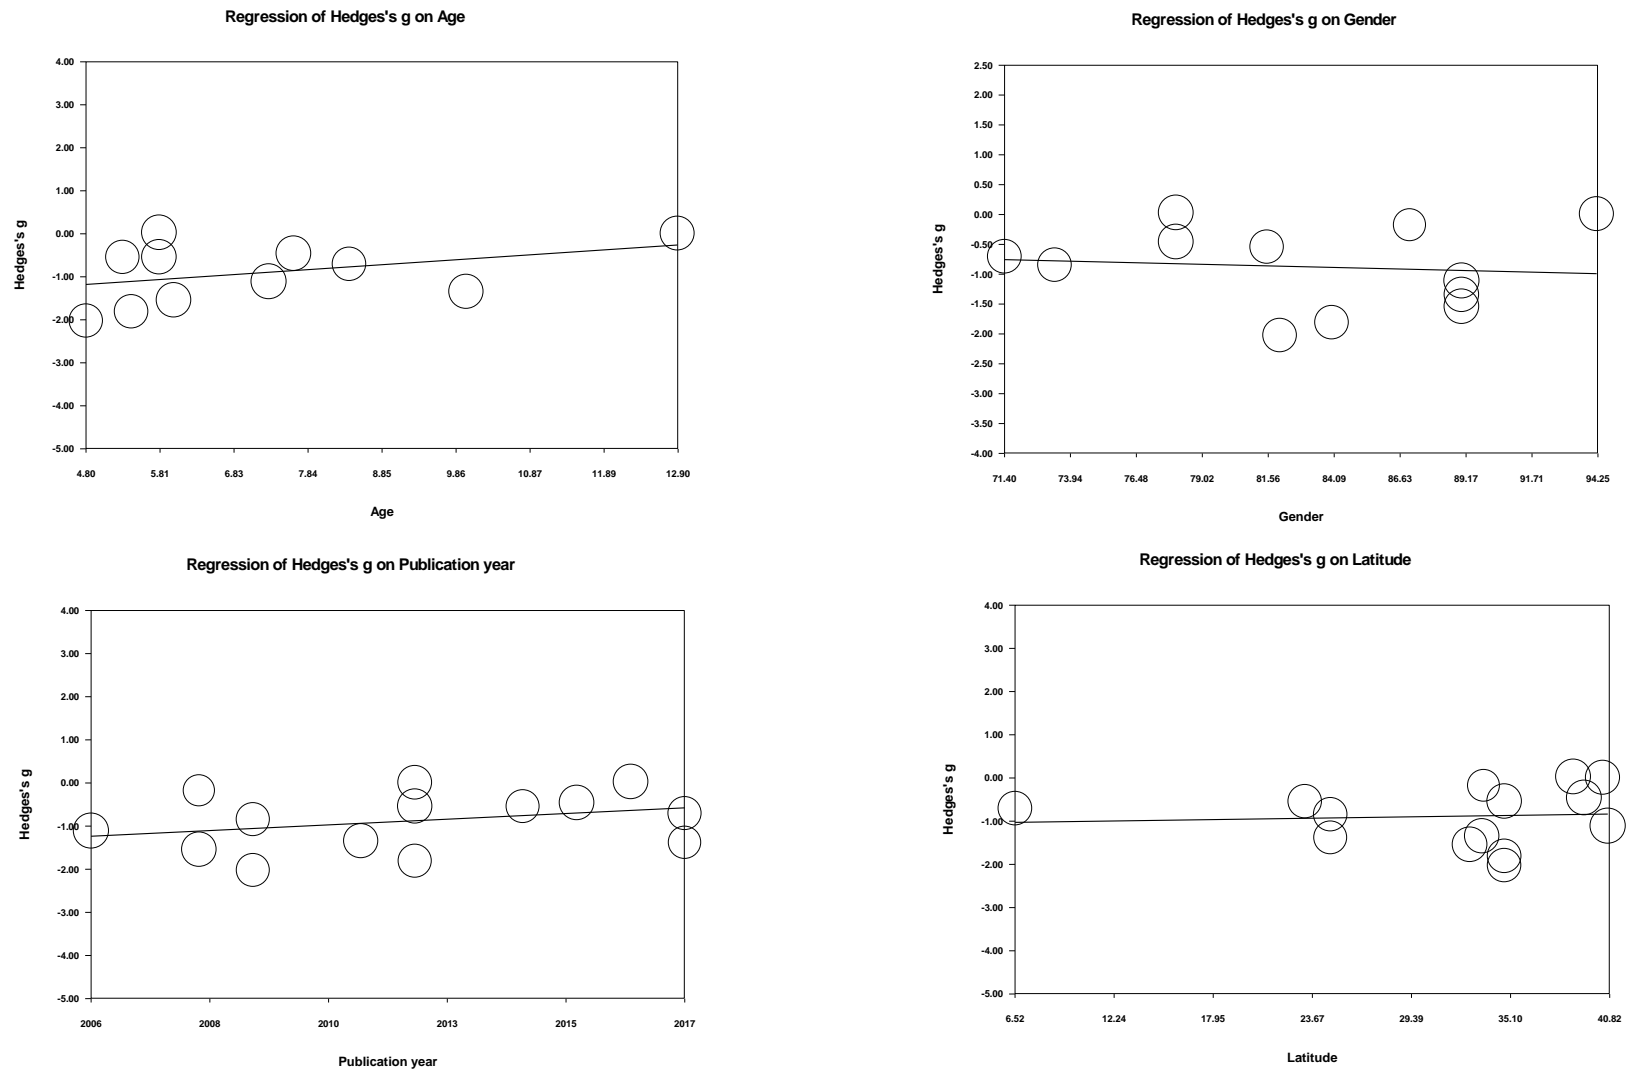

Association between age (Regression coefficient [SE]: 0.1134 [0.0872], 95%CI: -0.0575 to 0.2844,  $p = 0.1934$ ), gender (Regression coefficient[SE]: -0.0103 [0.0301], 95%CI: -0.0694 to 0.0488,  $p = 0.7320$ ), publication year (Regression coefficient[SE]: 0.0598 [0.0496], 95%CI: -0.0321 to 0.1517,  $p = 0.2021$ ), latitude (Regression coefficient[SE]: 0.0056 [0.0201], 95%CI: -0.0339 to 0.0451,  $p = 0.7806$ ) and effective size (Hedges's g) for GSH.

eFigure 4

A

Homocysteine

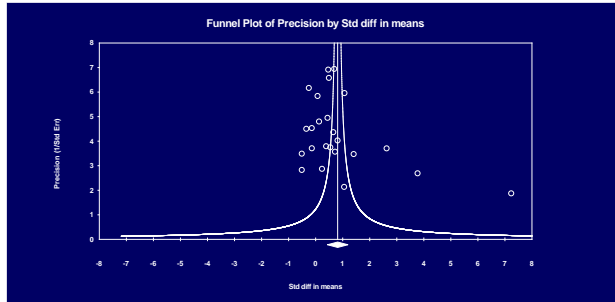

B

Methionine

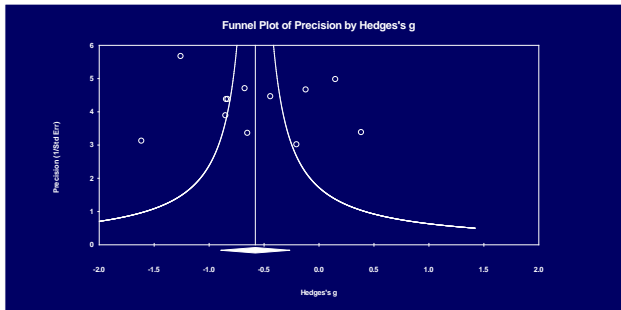

C

Cysteine

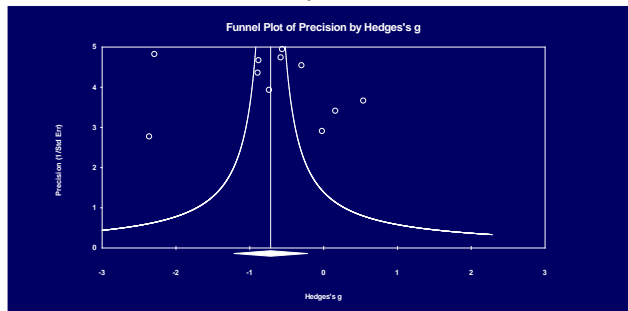

D

Vitamin B9

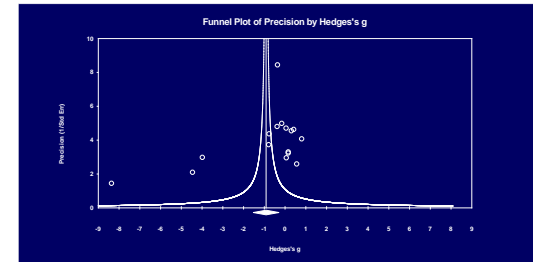

E

Vitamin B12

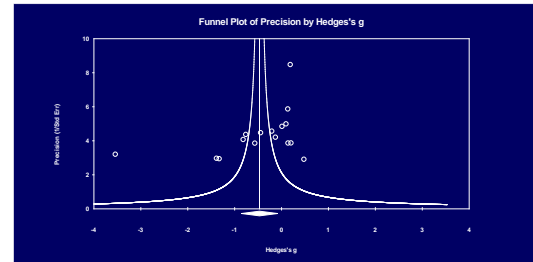

F

Vitamin D

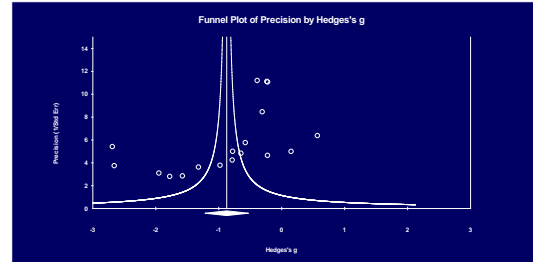

G

GSH

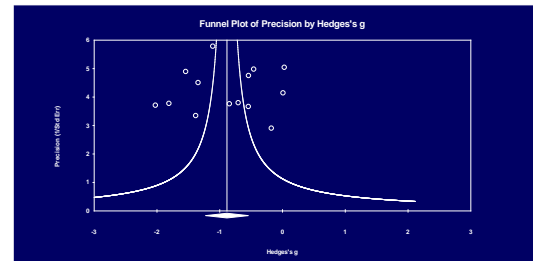

Funnel plots for studies analyzing blood homocysteine, methionine, cysteine, vitamin B9, vitamin B12, vitamin D and GSH levels



## eReference:

1. Al-Yafee YA, Al-Ayadhi LY, Haq SH, El-Ansary AK. Novel metabolic biomarkers related to sulfur-dependent detoxification pathways in autistic patients of Saudi Arabia. *BMC Neurol.* 2011; 11:139.
2. Al-Gadani Y, El-Ansary A, Attas O, Al-Ayadhi L. Metabolic biomarkers related to oxidative stress and antioxidant status in Saudi autistic children. *Clin Biochem.* 2009;42(10-11):1032-1040.
3. Rose S, Melnyk S, Trusty TA, et al. Intracellular and extracellular redox status and free radical generation in primary immune cells from children with autism. *Autism Res Treat.* 2012; 2012:986519.
4. El-Ansary A, Al-Daihan S, Al-Dbass A, Al-Ayadhi L. Measurement of selected ions related to oxidative stress and energy metabolism in Saudi autistic children. *Clin Biochem.* 2010;43(1-2):63-70.
5. El-Ansary A, Bjorklund G, Chirumbolo S, Alnakhli OM. Predictive value of selected biomarkers related to metabolism and oxidative stress in children with autism spectrum disorder. *Metab Brain Dis.* 2017;32(4):1209-1221.
6. Essa MM, Guillemin GJ, Waly MI, et al. Increased markers of oxidative stress in autistic children of the Oman. *Biol Trace Elem Res.* 2012;147(1-3):25-27.
7. Grayaa S, Zerbinati C, Messedi M, et al. Plasma oxysterol profiling in children reveals 24-hydroxycholesterol as a potential marker for Autism Spectrum Disorders. *Biochimie.* 2018; 153:80-85.
8. James SJ, Cutler P, Melnyk S, et al. Metabolic biomarkers of increased oxidative stress and impaired methylation capacity in children with autism. *Am J Clin Nutr.* 2004;80(6):1611-1617.
9. El-Ansary A. Data of multiple regressions analysis between selected biomarkers related to glutamate excitotoxicity and oxidative stress in Saudi autistic patients. *Data Brief.* 2016; 7:111-116.
10. Meguid NA, Dardir AA, Abdel-Raouf ER, Hashish A. Evaluation of oxidative stress in autism: defective antioxidant enzymes and increased lipid peroxidation. *Biol Trace Elem Res.* 2011;143(1):58-65.
11. Mostafa GA, El-Hadidi ES, Hewedi DH, Abdou MM. Oxidative stress in Egyptian children with autism: relation to autoimmunity. *J Neuroimmunol.* 2010;219(1-2):114-118.
12. Oshodi Y, Ojewunmi O, Oshodi TA, et al. Oxidative stress markers and genetic polymorphisms of glutathione S-transferase T1, M1, and P1 in a subset of children with autism spectrum disorder in Lagos, Nigeria. *Niger J Clin Pract.* 2017;20(9):1161-1167.
13. Yenkovyan K, Harutyunyan H, Harutyunyan A. A certain role of SOD/CAT imbalance in pathogenesis of autism spectrum disorders. *Free Radic Biol Med.* 2018; 123:85-95.
14. Yui K, Tanuma N, Yamada H, Kawasaki Y. Reduced endogenous urinary total antioxidant power and its relation of plasma antioxidant activity of superoxide dismutase in individuals with autism spectrum disorder. *Int J Dev Neurosci.* 2017; 60:70-77.
15. Yui K, Tanuma N, Yamada H, Kawasaki Y. Decreased total antioxidant capacity has a larger effect size than increased oxidant levels in urine in individuals with autism spectrum disorder. *Environ Sci Pollut Res Int.* 2017;24(10):9635-9644.
16. Adams JB, George F, Audhya T. Abnormally high plasma levels of vitamin B6 in children with autism not taking supplements compared to controls not taking supplements. *J Altern Complement Med.* 2006;12(1):59-63.
17. Adams JB, Audhya T, McDonough-Means S, et al. Nutritional and metabolic status of children with autism vs. neurotypical children, and the association with autism severity. *Nutr Metab (Lond).* 2011;8(1):34.
18. Adams M, Lucock M, Stuart J, Fardell S, Baker K, Ng X. Preliminary evidence for involvement of the folate gene polymorphism 19bp deletion-DHFR in occurrence of autism. *Neurosci Lett.* 2007;422(1):24-29.

19. D'Eufemia P, Finocchiaro R, Celli M, Viozzi L, Monteleone D, Giardini O. Low serum tryptophan to large neutral amino acids ratio in idiopathic infantile autism. *Biomed Pharmacother.* 1995;49(6):288-292.
20. Eto I, Bandy MD, Butterworth CE, Jr. Plasma and urinary levels of biopterin, neopterin, and related pterins and plasma levels of folate in infantile autism. *J Autism Dev Disord.* 1992;22(2):295-308.
21. Fatemi SH, Sary JM, Egan EA. Reduced blood levels of reelin as a vulnerability factor in pathophysiology of autistic disorder. *Cell Mol Neurobiol.* 2002;22(2):139-152.
22. Geier DA, Kern JK, Garver CR, Adams JB, Audhya T, Geier MR. A prospective study of transsulfuration biomarkers in autistic disorders. *Neurochem Res.* 2009;34(2):386-393.
23. James SJ, Melnyk S, Jernigan S, et al. Metabolic endophenotype and related genotypes are associated with oxidative stress in children with autism. *Am J Med Genet B Neuropsychiatr Genet.* 2006;141B(8):947-956.
24. Meguid NA, Hashish AF, Anwar M, Sidhom G. Reduced serum levels of 25-hydroxy and 1,25-dihydroxy vitamin D in Egyptian children with autism. *J Altern Complement Med.* 2010;16(6):641-645.
25. Melnyk S, Fuchs GJ, Schulz E, et al. Metabolic imbalance associated with methylation dysregulation and oxidative damage in children with autism. *J Autism Dev Disord.* 2012;42(3):367-377.
26. Pasca SP, Nemes B, Vlase L, et al. High levels of homocysteine and low serum paraoxonase 1 arylesterase activity in children with autism. *Life Sci.* 2006;78(19):2244-2248.
27. Pasca SP, Dronca E, Kaucsar T, et al. One carbon metabolism disturbance and the C677T MTHFR gene polymorphism in children with autism spectrum disorders. *J Cell Mol Med.* 2009;13(10):4229-4238.
28. Sogut S, Zoroglu SS, Ozyurt H, et al. Changes in nitric oxide levels and antioxidant enzyme activities may have a role in the pathophysiological mechanisms involved in autism. *Clin Chim Acta.* 2003;331(1-2):111-117.
29. Suh, J. H.; Walsh, W. J.; McGinnis, W. R.; Lewis, A.; Ames, B. N. Altered sulfur amino acid metabolism in immune cells of children diagnosed with autism. *Am J Biochem Biotechnol* 4:105–113; 2008.
30. Sweeten TL, Posey DJ, Shankar S, McDougle CJ. High nitric oxide production in autistic disorder: a possible role for interferon-gamma. *Biol Psychiatry.* 2004;55(4):434-437.
31. Vergani, L.; Lanza, C.; Rivaro, P.; Abemoschi, M. L.; Genti, S.; Veneselli, E.; Minniti, G.; Grasselli, E.; Canesi, L.; Voci, A. Metals, metallothioneins and oxidative stress in blood of autistic children. *Res Autism Spectrum Disord* 5:286–293; 2011.
32. Yorbik O, Sayal A, Akay C, Akbiyik DI, Sohmen T. Investigation of antioxidant enzymes in children with autistic disorder. *Prostaglandins Leukot Essent Fatty Acids.* 2002;67(5):341-343.
33. Bala KA, Dogan M, Kaba S, Mutluer T, Aslan O, Dogan SZ. Hormone disorder and vitamin deficiency in attention deficit hyperactivity disorder (ADHD) and autism spectrum disorders (ASDs). *J Pediatr Endocrinol Metab.* 2016;29(9):1077-1082.
34. Chauhan A, Chauhan V, Brown WT, Cohen I. Oxidative stress in autism: increased lipid peroxidation and reduced serum levels of ceruloplasmin and transferrin--the antioxidant proteins. *Life Sci.* 2004;75(21):2539-2549.
35. Skalny AV, Simashkova NV, Klyushnik TP, et al. Assessment of serum trace elements and electrolytes in children with childhood and atypical autism. *J Trace Elem Med Biol.* 2017; 43:9-14.
36. Skalny AV, Simashkova NV, Skalnaya AA, et al. Assessment of gender and age effects on serum and hair trace element levels in children with autism spectrum disorder. *Metab Brain Dis.* 2017;32(5):1675-1684.
37. Yui K, Imataka G, Kawasak Y, Yamada H. Increased omega-3 polyunsaturated fatty acid/arachidonic acid ratios and upregulation of signaling mediator in individuals with autism spectrum disorders. *Life Sci.* 2016; 145:205-212.

38. Bener A, Khattab AO, Al-Dabbagh MM. Is high prevalence of Vitamin D deficiency evidence for autism disorder? In a highly endogamous population. *J Pediatr Neurosci.* 2014; 9:227-33.
39. Al-Farsi YM, Waly MI, Deth RC, et al. Low folate and vitamin B12 nourishment is common in Omani children with newly diagnosed autism. *Nutrition.* 2013;29(3):537-541.
40. Ali A, Waly MI, Al-Farsi YM, Essa MM, Al-Sharbaty MM, Deth RC. Hyperhomocysteinemia among Omani autistic children: a case-control study. *Acta Biochim Pol.* 2011;58(4):547-551.
41. Arastoo AA, Khojastehkia H, Rahimi Z, et al. Evaluation of serum 25-Hydroxy vitamin D levels in children with autism Spectrum disorder. *Ital J Pediatr.* 2018;44(1):150.
42. Bugajska J, Berska J, Wojtyto T, Bik-Multanowski M, Sztefko K. The amino acid profile in blood plasma of young boys with autism. *Psychiatr Pol.* 2017;51(2):359-368.
43. Cai J, Ding L, Zhang JS, Xue J, Wang LZ. Elevated plasma levels of glutamate in children with autism spectrum disorders. *Neuroreport.* 2016;27(4):272-276.
44. Cortelazzo A, De Felice C, Guerranti R, et al. Expression and oxidative modifications of plasma proteins in autism spectrum disorders: Interplay between inflammatory response and lipid peroxidation. *Proteomics Clin Appl.* 2016;10(11):1103-1112.
45. Coskun S, Simsek S, Camkurt MA, Cim A, Celik SB. Association of polymorphisms in the vitamin D receptor gene and serum 25-hydroxyvitamin D levels in children with autism spectrum disorder. *Gene.* 2016;588(2):109-114.
46. El-Ansary AK, Ben Bacha AG, Al-Ayadhi LY. Proinflammatory and proapoptotic markers in relation to mono and di-cations in plasma of autistic patients from Saudi Arabia. *J Neuroinflammation.* 2011; 8:142.
47. El-Ansary A, Cannell JJ, Bjorklund G, et al. In the search for reliable biomarkers for the early diagnosis of autism spectrum disorder: the role of vitamin D. *Metab Brain Dis.* 2018;33(3):917-931.
48. Feng J, Shan L, Du L, et al. Clinical improvement following vitamin D3 supplementation in Autism Spectrum Disorder. *Nutr Neurosci.* 2017;20(5):284-290.
49. Garipardic M, Dogan M, Bala KA, et al. Association of Attention Deficit Hyperactivity Disorder and Autism Spectrum Disorders with Mean Platelet Volume and Vitamin D. *Med Sci Monit.* 2017; 23:1378-1384.
50. Gong ZL, Luo CM, Wang L, et al. Serum 25-hydroxyvitamin D levels in Chinese children with autism spectrum disorders. *Neuroreport.* 2014;25(1):23-27.
51. Gunes S, Ekinci O, Celik T. Iron deficiency parameters in autism spectrum disorder: clinical correlates and associated factors. *Ital J Pediatr.* 2017;43(1):86.
52. Han Y, Xi QQ, Dai W, et al. Abnormal transsulfuration metabolism and reduced antioxidant capacity in Chinese children with autism spectrum disorders. *Int J Dev Neurosci.* 2015; 46:27-32.
53. Hassan MH, Desoky T, Sakhr HM, Gabra RH, Bakri AH. Possible Metabolic Alterations among Autistic Male Children: Clinical and Biochemical Approaches. *J Mol Neurosci.* 2019;67(2):204-216.
54. Kim EK, Neggers YH, Shin CS, Kim E, Kim EM. Alterations in lipid profile of autistic boys: a case control study. *Nutr Res.* 2010;30(4):255-260.
55. Kondolot M, Ozmert EN, Asci A, et al. Plasma phthalate and bisphenol a levels and oxidant-antioxidant status in autistic children. *Environ Toxicol Pharmacol.* 2016; 43:149-158.
56. Li SO, Wang JL, Bjorklund G, Zhao WN, Yin CH. Serum copper and zinc levels in individuals with autism spectrum disorders. *Neuroreport.* 2014;25(15):1216-1220.
57. Mostafa GA, Al-Ayadhi LY. Reduced serum concentrations of 25-hydroxy vitamin D in children with autism: relation to autoimmunity. *J Neuroinflammation.* 2012; 9:201.
58. Parellada M, Moreno C, Mac-Dowell K, et al. Plasma antioxidant capacity is reduced in Asperger syndrome. *J Psychiatr Res.* 2012;46(3):394-401.
59. Ramaekers VT, Quadros EV, Sequeira JM. Role of folate receptor autoantibodies in infantile autism. *Mol Psychiatry.* 2013;18(3):270-271.
60. Saad K, Zahran AM, Elsayh KI, et al. Frequency of Dendritic Cells and Their Expression of Costimulatory Molecules in Children with Autism Spectrum Disorders. *J*

- Autism Dev Disord.* 2017;47(9):2671-2678.
61. Tirouvanziam R, Obukhanych TV, Laval J, et al. Distinct plasma profile of polar neutral amino acids, leucine, and glutamate in children with Autism Spectrum Disorders. *J Autism Dev Disord.* 2012;42(5):827-836.
  62. Tostes MH, Teixeira HC, Gattaz WF, Brandao MA, Raposo NR. Altered neurotrophin, neuropeptide, cytokines and nitric oxide levels in autism. *Pharmacopsychiatry.* 2012;45(6):241-243.
  63. Tu WJ, Yin CH, Guo YQ, et al. Serum homocysteine concentrations in Chinese children with autism. *Clin Chem Lab Med.* 2013;51(2): e19-22.
  64. Wang L, Jia J, Zhang J, Li K. Serum levels of SOD and risk of autism spectrum disorder: A case-control study. *Int J Dev Neurosci.* 2016; 51:12-16.
  65. Yui K, Imataka G, Kawasaki Y, Yamada H. Down-regulation of a signaling mediator in association with lowered plasma arachidonic acid levels in individuals with autism spectrum disorders. *Neurosci Lett.* 2016; 610:223-228.
  66. Zaki MM, Abdel-Al H, Al-Sawi M. Assessment of plasma amino acid profile in autism using cation-exchange chromatography with postcolumn derivatization by ninhydrin. *Turk J Med Sci.* 2017;47(1):260-267.
  67. Zhang QB, Gao SJ, Zhao HX. Thioredoxin: a novel, independent diagnosis marker in children with autism. *Int J Dev Neurosci.* 2015; 40:92-96.
  68. Zhou W, Li S. Decreased levels of serum retinoic acid in chinese children with autism spectrum disorder. *Psychiatry Res.* 2018; 269:469-473.
  69. Shimmura C, Suda S, Tsuchiya KJ, et al. Alteration of plasma glutamate and glutamine levels in children with high-functioning autism. *PLoS One.* 2011;6(10):e25340.
  70. Saha S, Saha T, Sinha S, Rajamma U, Mukhopadhyay K. Autistic traits and components of the folate metabolic system: an explorative analysis in the eastern Indian ASD subjects (dagger). *Nutr Neurosci.* 2019:1-8.
  71. Sweetman DU, O'Donnell SM, Lalor A, Grant T, Greaney H. Zinc and vitamin A deficiency in a cohort of children with autism spectrum disorder. *Child Care Health Dev.* 2019;45(3):380-386.
  72. Yektas C, Alpay M, Tufan AE. Comparison of serum B12, folate and homocysteine concentrations in children with autism spectrum disorder or attention deficit hyperactivity disorder and healthy controls. *Neuropsychiatr Dis Treat.* 2019; 15:2213-2219.
  73. Afrazeh M, Saedisar S, Khakzad MR, Hojati M (2015), Measurement of Serum Superoxide Dismutase and Its Relevance to Disease Intensity Autistic Children. *Maedica (Buchar)* 10:315-318.
  74. Altun H, Kurutas EB, Sahin N, Gungor O, Findikli E (2018), The Levels of Vitamin D, Vitamin D Receptor, Homocysteine and Complex B Vitamin in Children with Autism Spectrum Disorders. *Clin Psychopharmacol Neurosci* 16:383-390.
  75. Bicikova M, Macova L, Ostatnikova D, Hanzlikova L (2019), Vitamin D in autistic children and healthy controls. *Physiol Res* 68:317-320.
  76. Chen J, Xin K, Wei J, Zhang K, Xiao H (2016), Lower maternal serum 25(OH) D in first trimester associated with higher autism risk in Chinese offspring. *J Psychosom Res* 89:98-101.
  77. Cheng B, Zhu J, Yang T, Guo M, Lai X, Li Q, Chen J, Li T (2020), Vitamin A deficiency increases the risk of gastrointestinal comorbidity and exacerbates core symptoms in children with autism spectrum disorder. *Pediatr Res.*
  78. Ghodsi R, Kheirouri S (2019), Positive Association Between Plasma Levels of Advanced Glycation and Precursor of Lipoxidation end Products with Gastrointestinal Problems in Children with Autism. *Curr Pediatr Rev* 15:184-190.
  79. Guo M, Li L, Zhang Q, Chen L, Dai Y, Liu L, Feng J, Cai X, et al. (2018), Vitamin and mineral status of children with autism spectrum disorder in Hainan Province of China: associations with symptoms. *Nutr Neurosci*:1-8.
  80. Guo M, Zhu J, Yang T, Lai X, Lei Y, Chen J, Li T (2019), Vitamin A and vitamin D deficiencies exacerbate symptoms in children with autism spectrum disorders. *Nutr Neurosci* 22:637-647.
  81. Hodgson NW, Waly MI, Al-Farsi YM, Al-Sharbati MM, Al-Farsi O, Ali A, Ouhtit A, Zang T, et al. (2014), Decreased glutathione and elevated hair mercury levels are associated with nutritional deficiency-based autism in Oman. *Exp Biol Med (Maywood)* 239:697-706.

82. James SJ, Melnyk S, Fuchs G, Reid T, Jernigan S, Pavliv O, Hubanks A, Gaylor DW (2009), Efficacy of methylcobalamin and folinic acid treatment on glutathione redox status in children with autism. *Am J Clin Nutr* 89:425-430.
83. Main PA, Thomas P, Angley MT, Young R, Esterman A, King CE, Fenech MF (2015), Lack of evidence for genomic instability in autistic children as measured by the cytokinesis-block micronucleus cytome assay. *Autism Res* 8:94-104.
84. Ning J, Xu L, Shen CQ, Zhang YY, Zhao Q (2019), Increased serum levels of macrophage migration inhibitory factor in autism spectrum disorders. *Neurotoxicology* 71:1-5.
85. Russo AJ, Devito R (2011), Analysis of Copper and Zinc Plasma Concentration and the Efficacy of Zinc Therapy in Individuals with Asperger's Syndrome, Pervasive Developmental Disorder Not Otherwise Specified (PDD-NOS) and Autism. *Biomark Insights* 6:127-133.
86. Saad K, Abdel-Rahman AA, Elserogy YM, Al-Atram AA, Cannell JJ, Bjorklund G, Abdel-Reheim MK, Othman HA, et al. (2016), Vitamin D status in autism spectrum disorders and the efficacy of vitamin D supplementation in autistic children. *Nutr Neurosci* 19:346-351.
87. Sun C, Zou M, Zhao D, Xia W, Wu L (2016), Efficacy of Folic Acid Supplementation in Autistic Children Participating in Structured Teaching: An Open-Label Trial. *Nutrients* 8.
